# Supplementary material for: What Can Be Learnt by a Synoptic Review of Plant Disease Epidemics and Outbreaks Published in 2021
Source: Preprints.org preprint supplement (doi:10.20944/preprints202209.0152.v2), 2023-02-23
Supplement: Supplementary file 1 [file supplementary]

**ELECTRONIC SUPPORTING INFORMATION S1. SINGLE NAMED SPECIES IDENTIFIED IN STAGE 1 OF THE REVIEW OF PUBLISHED ARTICLES**

Results from Stage 1, categorised by the class of named species agent: fungi, oomycetes, bacteria, phytoplasmas, viruses/viroid and nematodes. “Type” is relative to our categorisation: A = detection, discrimination & analysis; B = surveillance, including growers and citizen science; C = emergence of new pathogens, strains, and vectors; D = wild hosts and weeds as inoculum reservoirs; E = wild relatives, land races, and genetic resources; F = wild plant populations and communities; G = disease management, including varietal resistance; H = biological control; I = climate change and variability; and J = yield loss estimation. Rows with “Species” starting Ca. designate the relevant Candidatus.

| **FUNGI** |  | | | |
| --- | --- | --- | --- | --- |
| **Species** | **Host/disease** | **Source** | **Location** | **Type** |
| *Alternaria brassicola* | *Cakile maritima* | Papaix 2021 | Australia | F |
| *Athelia rolfsii* | *Vincetoxicum* spp./southern blight | Pethybridge et al. 2021 | USA | D |
| *Austropuccinia psidii* | Myrtaceae/myrtle rust | Fensham & Radford-Smith, 2021 | Australia | F |
| *Bretziella fagacearum* | Oak spp./oak wilt | Pellegrini et al. 2021 | USA | F |
| *Ceratocystis ficicola* | Fig/vascular wilt | Tsopelas et al. 2021 | Greece | C |
| *Ciboria caunculoides*  *Ciboria shiraiana*  *Scleromitrula shiraiana* | Mulberry/mulberry sclerotial disease | Lv et al. 2022 | China | A |
| *Colletotrichum siamense* | Rubber trees/leaf disease | Du et al. 2021 | China | A |
| *Colletotrichum* spp. | Apple/bitter rot | Martin et al. 2021 | USA | G |
| *Cronatium ribicola* | White pines/blister rust | Dudney et al. 2021 | USA | I |
| *Diaporthe* spp | Tree species/dieback | Lopes et al. 2021 | Portugal | C |
| *Diplodia corticola*  *Diplodia quercivora* | Oak spp./canker | Fereira et al. 2021 | USA | A |
| *Fusarium graminearum* | Cereals and legumes/head blight, seedling disease and root rot | Breunig and Chilvers 2021 | USA | G |
| *Fusarium* *oxysporum* f.sp *cubensis* | Banana/Fusarium wilt | Heck et al. 2021 | Brazil | G |
| *Fusarium* species complex | Sugarcane/pokkah boeng disease | Shan et al. 2021 | China | G |
| Tomato/Fusarium disease | Nawaz et al. 2021 | Pakistan | G |
| Chickpea/Fusarium wilt | Bekele et al. 2021 | Ethiopia | G |
| *Magnaporthe oryzae* | Rice/ leaf and panicle blast | Wang et al. 2021a | Italy | I |
| *Neonectria neomacrospora* | Abies/shoot necrosis and cankers | González et al. 2021 | UK | C |
| *Phyllachora maydis* | Maize/tar spot | Oh et al. 2021 | USA | B |
| *Physoderma* sp. | Faba bean/gall disease | Bitew et al. 2021 | Ethiopia | C |
| *Plenodomas lingam*  *Plenodomus biglobosus*  *Pyrenopeziza brassicae* | Brassicaceae crops and weeds/black leg and chlorotic leaf spot | Claasen et al. 2021 | USA | D |
| *Podosphaeria plantaginis* | Ribwort plantain/powdery mildew | Eck et al. 2021 | Finland | F |
| *Pseudocercospora fijiensis* | Banana/black leaf streak | Carlier et al. 2021 | Central America  & Caribbean | B |
| *Puccinia polysora* | Maize/southern corn rust | Halvorsun et al. 2021 | USA | A |
| *Puccinia striiformis* f.sp *tritici* | Wheat/ yellow rust | Perronne et al. 2021  Esmail et al. 2021  Sandhu et al. 2021 | France  Egypt  Australia | C  C  G |
| *Pyrenophora semeniperda* | Barley/ring spot | Dokhanchi et al. 2022 | Iran | C |
| *Raffaelea quercus-mongolicae* | Oak/systemic wilt | Lee et al. 2021 | South Korea | C |
| *Septophoma terrestris* | Onion/pink root rot | Yoshida 2022 | Japan | G |
| *Sporisorium scitamineum* | Sugarcane/sugarcane smut | Tegene et al. 2021 | Ethiopia | G |
| *Tilletia indica* | Wheat/Karnal bunt | Arif et al. 2021 | Pakistan | G |
| *Zymoseptoria tritici* | Wheat/Septoria tritici leaf blotch | Garnault et al. 2021 | France | C |
| **OOMYCETES** | **FUNGIFUNGI** | | | |
| *Phytophthora austrocedri* | Juniper mortality | Donald et al. 2021 | UK | C |
| *Phytophthora capsici* | Vegetable crops/Phytophthora blight | Hudson et al. 2021 | USA | G |
| *Phytophthora cinnamomi* | Many hosts | Shayka et al. 2021 | Global | - |
| Holm oak/oak decline | Hornero et al. 2021 | Spain | B |
| *Phytophthora infestans* | Potato/late blight | Monteros-Altamirano & Delgado, 2021  Kanetis et al., 2021 | Ecuador  Cyprus | E  C |
| *Phytophthora megakarya* | Cacao/black pod | Djeumekop et al. 2021 | Cameroon | G |
| *Phytophthora ramorum* | Tree & horticultural hosts/sudden death oak & larch, leaf & shoot blights | Jung et al. 2021 | East Asia | F |
| Tree hosts/sudden oak death | Rosenthal et al. 2021 | USA | F |
| **BACTERIA** |  | | | |
| *Ca.* Liberibacter asiatica/africanus | Citrus/Huanglongbing | Bibi et al. 2021  Espinosa-Zaragoza et al. 2021  Garcia-Figuera et al. 2021 | Pakistan  Mexico  USA | G  C  G |
| *Dickeya* and *Pectobacterium* spp. | Potato/black leg and soft rot. | Curland et al. 2021 | USA | A |
| *Erwinia amylovora* | Pear/fire blight | Trad & Tauoeb 2021 | Tunisia | E |
| Wild walnut-fruit forests/fire blight | Doolotkeldieva et al. 2021 | Kyrgyzstan | E |
| Rosaceae plants/fire blight | Song et al. 2021 | Korea | C |
| Strawberry/bacterial blight | Ozturk & Soylu 2021 | Turkey | C |
| *Pseudomonas syringae* pathovars | Pea/bacterial blight | Kant et al. 2021 | Australia | A |
| *Ralstonia solanacearum* | Potato/bacterial blight | Tafesse et al. 2021  Marković et al. 2021 | Ethiopia  Serbia | G  A |
| Tobacco/wilt disease | Tan et al. 2021 | China | H |
| *Xanthomonas citri* pv. *citri* | Citrus/Asiatic citrus canker | Pruvost et al. 2021 | South-west Indian Ocean islands | C |
| *Xylella fastidiosa* and vectors | Almond/leaf scorch | Lazaro et al. 2021 | Spain | B |
| Spittlebug vectors on grapevine | Bodino et al. 2021  Gargani et al. 2021 | Italy  Italy | B  B |
| Olive/olive quick decline | Beal et al. 2021  Poblete et al. 2021 | USA  Spain | B  A |
| Almond/almond scorch disease  Grapevine/Pierce’s disease | Olmo et al. 2021 | Balearic Islands (Spain) | C |
| Olive/olive quick decline  Almond/almond scorch disease | Zarco-Tejada et al. 2021 | Italy/Spain | B |
| **PHYTOPLASMAS** |  | | | |
| *Ca*. Phytoplasma dypsidis | Ornamental palms/lethal wilt disease | Jones et al. 2021 | Australia | **C** |
| *Ca*. Phytoplasma solani | Multiple hosts and weeds/“bois noir” & “stolbur” diseases | Contaldo et al. 2021 | European countries | A |
| *Ca.* Phytoplasma vitis | Grapevine/flavescence doree | Rizzoli et al. 2021 | Switzerland | D |
| Unassigned phytoplasma/virus associations | Areca palm/yellow leaf disease | Lei et al. 2021 | China | B |
| **VIRUSES & VIROIDS** |  | | | |
| Cassava viruses and vectors | Cassava/African cassava mosaic disease and cassava brown streak disease | Munguti et al. 2021 | Kenya | C |
| Cassava/Sri Lankan cassava mosaic disease | Saokham et al. 2021 | Thailand | A |
| Cereal/barley yellow dwarf viruses | Cereals and grasses | Somera et al. | Estonia | A |
| Citrus tristeza virus | Citrus | Pais da Cunha et al. 2021 | Angola | C |
| Wild citrus | Liu et al. 2021 | China | A |
| Groundnut bud necrosis orthotospovirus | Tomato  Groundnut  N. benthamiana | Chaudhary et al. 2021 | India | A |
| Maize chlorotic mottle virus/Sugarcane mosaic virus | Maize/maize lethal necrosis | De Groote et al. 2021 | Kenya | B |
| Maize rayado fino virus  Corn stunt spiroplasma  Maize bushy stunt phytoplasma  and vectors | Maize/corn stunt | Rossini et al. 2021 | Argentina | G |
| Rice stripe mosaic virus | Rice/rice stripe mosaic disease | Wang et al. 2021b | China | G |
| Rice yellow mottle virus | Rice | Issaka et al. 2021 | Niger | B |
| Plantago viruses | *Plantago lanceolata* | Susi & Laine 2021 | Finland | F |
| Tomato brown rugose fruit virus | Tomato | González-Concha et al. 2021 | Mexico | G |
| Tomato chlorosis virus | Multiple hosts | Esquivel-Fariña et al. 2021 | Brazil  USA | G |
| **NEMATODES** |  | | | |
| *Bursephalenchus xyophilus* and vectors | *Pinus*/pine wood nematode | Atkins et al. 2021  Zhang et al. 2021  Yu et al. 2021 | USA  China  China | B  B  B |
| *Globodera rostochiensis* | Potato/cyst nematode | Borzykh et al. 2021 | Ukraine | B |
| *Heterodera glycines* | Soybean/cyst nematode | Bradley et al. 2021 | USA/Canada | J |
| *Meloidogyne spp* complexes | Tomato | Teston et al. 2021 | USA | G |
| *Pratylenchus hippeastri* | Strawberry | Brenes-Campos et al. 2021 | Costa Rica | A |

**References**

Arif, M., Atta, S., Bashir, M. A., Khan, M. I., Hussain, A., Shahjahan, M., et al. 2021. The impact of Fosetyl-Aluminium application timing on Karnal bunt suppression and economic returns of bread wheat (*Triticum aestivum* L.). PLoS ONE 16: e0244931.

Atkins, D. H., Davis, T. S., Stewart, J. E. 2021. Probability of occurrence and phenology of pine wilt disease transmission by insect vectors in the Rocky Mountains. Ecological Solutions and Evidence 2: e12044.

Beal, D. J., Cooper, M., Daugherty, M. P., Purcell, A. H., and Almeida, R. 2021. Seasonal abundance and infectivity of *Philaenus spumarious* (Hemiptera: Aphrophoridae) a vector of *Xylella fastidiosa* in California vineyards. Environmental Entomology 50: 467-476.

Bekele, D., Tesfaye, K., Fikre, A., and Cook, D. R. 2021. The extent and association of chickpea *Fusarium* wilt and root rot disease pressure with major biophysical factors in Ethiopia. Journal of Plant Pathology 103: 409-419.

Bibi, M., Hanif, M. K., Sarwar, M. U., Khan, M. I., Khan, S. Z., Shivachi, C. S., et al. 2021. Monitoring population phenology of Asian citrus psyllid using deep learning. Complexity: online 4644213.

Bitew, B., Fininsa, C., Terefe, H., Barbetti, M., and Ahmed S. 2021. Spatial and temporal distribution of faba bean gall (*Physoderma*) disease and its association with biophysical factors in Ethiopia. International Journal of Pest Management, online October 2021.

Bodino, N., Demichelis, S., Simonetto, A., Volani, S., Saladini M. A., Gilioli, G., et al. 2021. Phenology, seasonal abundance, and host-plant association of spittlebugs (Hemiptera: Aphrophoridae) in vineyards of northwestern Italy. Insects 12: 1012.

Borzykh, O. I., D. D. Sigareva, D. D., Fedorenko, O. L., Bondar, T. I., Kornyushin, V. V., Sokolova, O. O., et al. 2021. Current distribution of Golden Potato Cyst Nematode, *Globodera rostochiensis* (Tylenchida, Heteroderidae), in Ukraine. Zoodiversity 55: 167–174.

Bradley, C. A., Allen, T. W., Sisson, A. J., Bergstrom, C. G., Bissonnette, K. M., and Bond, J. 2021. Soybean yield loss estimates due to diseases in the United States and Ontario, Canada, from 2015-2019. Plant Health Progress 22: 483-495.

Brenes-Campos, R., Nύñez-Rodríguez, L. A., Flores-Chaves, L., Humphreys-Pereira, D. A. 2021. New record of the amaryllis lesion nematode, *Pratylenchus hippeastri* associated with strawberry in the central region of Costa Rica. Nematropica 51: 131-136.

Breunig M., and Chilvers, M. I. 2021. Baseline sensitivity of *Fusarium graminearum* from wheat, corn, dry bean and soybean to pydiflumetofen in Michigan, USA. Crop Protection 140: 105419.

Carlier J., Robert, S., Roussel, V., Chilin-Charles, Y., Lubin-Adjanoh, N., Gilabert, A., et al. 2021. Central American and Caribbean population history of the *Pseudocercospora fijiensis* fungus responsible for the latest worldwide pandemics on banana. Fungal Genetics and Biology 148: 103528.

Chaudhary, M., Verma, S., Kumar, A., Basavaraj, Y. B., Tiwari, P., Singh, S., et al. 2021. Graphene oxide based electrochemical immunosensor for rapid detection of groundnut bud necrosis orthotospovirus in agricultural crops. Talanta 235: 122717.

Classen, B. J., Berry, P. A., Thomas, W. J., Mallory-Smith, C., and Ocamb, C. M. 2021. Black leg and chlorotic leaf spot occurrence on Brassicaceae crop and weed hosts. Plant Disease 105: 3418-3425.

Contaldo, N., Stepanović, J., Pacini, F., Bertaccini, A., and Duduk, B. 2021. Molecular variability and host distribution of ‘*Candidatus* Phytoplasma solani’ strains from different geographic origins. Microorganisms 9: 2530.

Curland, R. D., Mainello, A., Perry, K. L., Hao, J., Charkowski, A. O., Bull, C. T., et al. 2021. Species of *Dickeya* and *Pectobacterium* isolated during an outbreak of blackleg and soft rot of potato in northeastern and north central USA. Microorganisms 9: 1733.

De Groote, H., Munyua, B. G., Palmas, S., Suresh, L. M., Bruce, A. Y., and Kimenju, S. 2021.Using panel community surveys to track the impact of crop pests over time and space – the case of maize lethal necrosis (MLN) disease in Kenya from 2013-2018. Plant Disease 105: 1259-1271.

Djeumekop, M. M. N., Bieng, M.-A. N., Ribeyre, F., Bonnot, F., Cilas, C., Neema, C., et al. 2021. Spatial and temporal analysis of *Phytophthora megakarya* epidemic in newly established cacao plantations. Plant Disease 105: 1448-1460.

Dokhanchi, H., Arzanlou, M., and Abed-Ashtiani, F. 2022. First occurrence of *Pyrenophora semeniperda* a new pathogen on barley in Iran. Cereal Research Communications 50: 59-66.

Donald, F., Purse, B. V., and Green, S. 2021. Investigation the role of restoration plantings in introducing disease – a case study using *Phytophthora*. Forests 12: 764.

Doolotkeldieva, T., Bobushova, S., Carnal, S., Rezzonico. F. 2021. Genetic characterization of Erwinia amylovora isolates detected in the wild walnut-fruit forests of South Kyrgyzstan. Journal of Plant Pathology 103: 109-120.

Du, Y., Wang, M., Zou, L., Long, M., Yang, Y., Zhang, Y., et al. 2021. Quantitative detection and monitoring of *Colletotrichum siamense* in rubber trees using real-time PCR. Plant Disease 105: 2822-2827.

Dudney, J., Willing, C. E., Das, A. J., Latimer, A. M., Nesmith, J. C. B., and Battles, J. J. 2021. Nonlinear shifts in infectious rust disease due to climate change. Nature Communications online.

Eck, J. L., Barres, B., Soubeyrand, S., Siren, J, Numminen, E., and Laine, A-L. 2021. Strain diversity and spatial distribution are linked to epidemic dynamics in host populations. American Naturalist online November 2021.

Esmail, S. M., Draz, I. S., Ashmawy, M. A., and El-Oraby, W. M. 2021. Emergence of new aggressive races of *Puccinia striiformis* f.sp *tritici* causing yellow rust epiphytotic in Egypt. Physiological and Molecular Plant Pathology 114: 101612.

Espinosa-Zaragoza, S., Pérez-De la O, Aquirre-Medina, J. F., and López-Martínez, V. 2021. Does the African citrus psyllid, *Trioza erytreae*, represent a phytosanitary threat to the citrus industry in Mexico? Insects 12: 450.

Esquivel-Fariña, A., Rezende, J. A. M., Wintermantel, W. M., Hladky, L. J., and Bampi, D. 2021. Natural infection rate of known tomato chlorosis virus-susceptible hosts and the influence of the host plant on the virus relationship with *Bemisia tabaci* MEAM1. Plant Disease 105: 1390-1397.

Fensham, R. J. and Radford-Smith, J. 2021. Unprecedented extinction of tree species by fungal disease. Biological Conservation 261: 109276.

Ferreira, S. L., Stauder, C. M., Martin, D. K. H., and Kasson, M. T. 2021. Morphological and phylogenetic resolution of *Diplodia corticola* and *D. quercivora*, emerging canker pathogens of oak (*Quercus* spp.) in the United States. Plant Disease 105: 1298-1307.

Garcia-Figuera, S., Deniston-Sheets, H., Grafton-Cardwell, E., Babcock, B., and McRoberts, N. 2021. Perceived vulnerability and propensity to adopt best management practices for Huanglongbing disease of citrus in California. Phytopathology 111: 1758-1773.

Gargani, E., Benvenuti, C., Marianelli, L., Roversi, P. F., Ricciolini, L., Scarpelli, I. 2021. A five-year survey in Tuscany (Italy) and detection of *Xylella fastidiosa* subspecies *multiplex* in potential insect vectors, collected in Monte Argentario. REDIA 104: 75-88.

Garnault, M., Duplaix, C., Leroux, P., Couleaud G, David, O., Walker, A.-S., et al. 2021. Large-scale study validates that regional fungicide applications are major determinants of resistance evolution in the wheat pathogen *Zymoseptoria tritici* in France. New Phytologist 229: 3508-3521.

González, M., Reynolds, C., Forster, J., van der Linde, S., Parrat, M., Dvorak, M., et al. 2021. Incidence of the emerging pathogen *Neonectria neomacrospora* on *Abies* taxa in the National Aboreta in England (UK). Forest Ecology and Management 492: 119207.

González-Concha, L. F., Ramírez-Gill, J. G., García-Estrada, R. S., Rebollar-Alviter, A., and Tovar-Pedraza, J. M. 2021. Spatiotemporal analyses of tomato brown rugose fruit virus in commercial tomato greenhouses. Agronomy 11: 1268.

Halvorson, J., Kim, Y., Gill, U., and Friskop, A. 2021. First report of the southern corn rust pathogen *Puccinia polysora* on *Zea mays* in North Dakota. Canadian Journal of Plant Pathology 43: sup2, S352-S357.

Heck, D. W., Dita, M., Del Ponte, E. M., and Mizubuti, E. S. G. 2021. Incidence, spatial pattern and temporal progress of Fusarium wilt of bananas. Journal of Fungi 7: 646.

Hornero, A., Zarco-Tejada, P. J., Quero, J. L., North, P. R. J., Ruiz-Gomez, F. J., Sanchez-Cuesta, R., et al. 2021. Modelling hyperspectral and thermal-based plant traits for the early detection of Phytophthora-induced symptoms in oak decline. Remote Sensing of Environment 263: 112570.

Hudson, O., Waliullah, S., Ji, P. S., Hand, J., Price, J., Hancock, G., et al. 2021. Detection of *Phytophthora capsica* from irrigation ponds in South Georgia. Plant Health Progress 22: 380-383.

Issaka, S., Traore, O., Longue, R. D. S., Pinel-Galzi, A., Gill, M. S., Dellicour, S., et al. 2021. Rivers and landscape ecology of a plant virus, rice yellow mottle virus along the Niger valley. Virus Evolution 7: veab072.

Jones, L. M., Pease, B., Perkins, S. L., Constable, F. E., Kinoti, W. M., Warmington, D., et al. 2021. ‘*Candidatus* Phytoplasma dypsidis’ a novel taxon associated with a lethal wilt disease of palms in Australia. International Journal of Systematic and Evolutionary Microbiology 71: 004818.

Jung, T. M., Jung, M. H., Webber, J. F., Kageyama, K., Hieno, A., Masuya, H., et al. 2021. The destructive tree pathogen *Phytophthora ramorum* originates from the Laurosilva forests of East Asia. Journal of Fungi 7: 226.

Kanetis, L. I., Pittas, L., Nikoloudakis, N., Cooke, D. E. L., and Ioannou, N. 2021. Characterization of *Phytophthora infestans* populations in Cyprus, the southernmost potato-producing European country. Plant Disease 105: 3407-3417.

Kant, P., Fruzangohar, M., Mann, R., Rodoni, B., Hollaway, G., and Rosewarne, G. 2021. Development and application of a Loop-Mediated Isothermal Amplification (LAMP) assay for the detection of *Pseudomonas syringae* pathovars *pisi* and *syringae*. Agriculture-Basel 11: 875.

Lazaro, E., Sese, M., Lopez-Quilez, A., Conesa, D, Dalmau, V., Ferrer, A., et al. 2021. Tracking the outbreak: an optimised sequential adaptive strategy for *Xylella fastidiosa* delimiting surveys. Biological Invasions 23: 3243-3261.

Lee, D-H., Jung, J-M., and Seo, S. T. 2021. Population genetic structure of *Raffaelae quercus-mongolicae* indicates a recent fungal introduction event to Jeju Island from inland areas of South Korea. Plant Pathology 70: 1871-1882.

Lei, S., Luo, J., Tao, X., and Qiu, Z. 2021. Remote sensing detecting of yellow leaf disease of aracanut based on UAV multisource sensors. Remote Sensing 13: 4562.

Liu, Q., Zhang, S., Mei, S., Zhou, Y., Wang, J., Han, G.-Z., et al. 2021. Viromics reveals extraordinary genetic diversity of the family Closteroviridae in wild citrus. PLoS Pathogens 17: e1009751.

Lopes, A. F., Batista, E., Hilário, S., Santos, L., and Alves, A. 2021. Occurrence of *Diaporthe* spp in *Eucalyptus globulus*, *Pinus pinaster* and *Quercus suber* in Portugal. Forest Pathology 51: e12674.

Lv, Z., He, Z., Yuan, J., Hao, L., Song, Z., Chen, G., et al. 2022. Identification and rapid detection of fungal pathogens causing mulberry sclerotial disease in south-west China. Plant Pathology 71: 684-695.

Marković, S., Stanković, S., Iličić, R., Jovanović, S. V., Komić, S. M., Jelušić, A., et al. 2021. *Ralstonia solanacearum* as a potato pathogen in Serbia: characterization of strains and influence on peroxidase activity in tubers. Plant Pathology 70: 1945-1959.

Martin, P. L., Krawczyk, T., Khodadadi, F., Acimovic, S. G., and Peter, K. A. 2021. Bitter rot of apple in the mid-Atlantic United States: causal species and evaluation of the impacts of regional weather patterns and cultivar susceptibility. Phytopathology 111: 966-981.

Monteros-Altamirano, A., and Delgado, R. 2021. Late blight resistance of Ecuadorian potato land races: field evaluation and farmer’s perception. Revista de la Facultad de Agronomia de la Universdad del Zulia 38: 505-524.

Munguti, F. M., Kilalo, D. C., Nyaboga, E. N., Wosula, E. N., Macharia, I., and Mwango’be, A. W. 2021. Distribution and molecular diversity of whitefly species colonising cassava in Kenya. Insects 12: 875.

Nawaz, H., Ali, M. A., Atif, R. M., Nawaz, A., and Abbas, A. 2021. Incidence of fusarium wilt in major tomato growing areas of Punjab. Pakistan Journal of Agricultural Science 58: 1205-1213.

Oh, S., Lee, D.-Y., Gongora-Canul, C., Ashapure, A., Carpenter, J., Cruz, A. P., et al. 2021. Tar spot disease quantification using unmanned aircraft systems (UAS) data. Remote Sensing 13: 2567.

Olmo, D., Nieto, A., Borràs, D., Montesinos, M., Androver, F., Pascual, A., et al. 2021. Landscape epidemiology of *Xylella fastidiosa* in the Balearic Islands. Agronomy 11: 473.

Ozturk, M. and Soylu, S. 2021. A new disease of strawberry, bacterial blight caused by *Erwinia amylovora* in Turkey. Journal of Plant Pathology 104: 269-280.

Pais da Cunha, A. T., Chiumenti, M., Laceira, L. C., Abou Kubaa, R., Loconsole, G., Pantaleo, V. 2021. High throughput sequencing from Angolan citrus accessions discloses the presence of emerging CTV strains. Virology Journal 18: 62.

Papaix, J., Burdon, J. J., Walker, E., Barrett, L. G., and Thrall, P. H. 2021. Metapopulation structure predicts population dynamics in the *Cakile maritima*-*Alternaria brassicicola* host pathogen interaction. American Naturalist 197: E55-E71.

Pellegrini, A. F. A., Hein, A. M., Cavender-Bares, J., Montgomery, R. A., Staver, A. C., Silla, F., et al. 2021. Disease and fire interact to influence transitions between savanna-forest ecosystems over a multi-decadal experiment. Ecology Letters 24: 1007-1017.

Perronne, R., Dubs, F., de Vallavieille-Pope, C., Leconte, M., du Cheyron P., Cadot, V., et al. 2021. Spatiotemporal changes in varietal resistance to wheat yellow rust in France reveal an increase in field resistance level during the period 1985-2018. Phytopathology 111: 1602-1612.

Pethybridge, S. J., Murphy, S., Sharma, S., Biazzo, J., and Milbrath, L. R. 2021. Southern blight of perennial swallowwort (*Vincetoxicum* spp.) in New York. Invasive Plant Science and Management 14: 223-231.

Poblete, T., Navas-Cortes, J. A., Camino, C., Calderon, R., Hornero, A., Gonzalez-Dugo, V., et al. 2021. Discriminating *Xylella fastidiosa* from *Verticillium dahliae* infections in olive trees using thermal- and hyperspectral-based plant traits. ISPRS Journal of Photogrammetry and Remote Sensing 179: 133-144.

Pruvost, O., Richard, D., Boyer, K., Javegney, S., Boyer, C., Chiroleu, F. 2021. Diversity and geographical structure of *Xanthomonas citri* pv *citri* on citrus in the South West Indian Ocean region. Microorganisms 9: 945.

Rizzoli, A., Belgeri, E., Jermini, M., Conedera, M., Filippin, L., and Angelini, E. 2021. *Alnus glutinosa* and *Orientus ishidae* (Matsumura, 1902) share phytoplasma genotypes linked to the ‘Flavescence dorée’ epidemics. Journal of Applied Entomology 145: 1015-1028.

Rosenthal, L. M., Simler-Williamson, A. B., and Rizzo, D. M. 2021. Community-level prevalence of a forest pathogen, not individual-level disease risk, declines with tree diversity. Ecology Letters 24: 2477-2489.

Rossini, L., Virla, E. G., Albarracín, E. L., Van Nieuwenhove, G., A., and Spiranza, S. 2021. Evaluation of a physiologically based model to predict *Dalbulus maidis* occurrence in maize crops: validation in two different subtropical areas of South America. Entomologia Experimentalis et Applicata 169: 597-609.

Sandhu, K. S., Singh, D., and Park, R. F. 2022. A pictorial disease assessment scale for assessing wheat stripe rust at adult plant growth stage. Australasian Plant Pathology 51: 27-29.

Saokham, K., Hemniam, N., Roekwan, S., Hunsawattanakul, S., Thawinampan, J., and Siriwan, W. 2021. Survey and molecular detection of Sri Lankan cassava mosaic virus in Thailand. PLoS ONE 16: e0252846.

Shakya, S. K., Grϋnwald, N. J., Fieland, V. J., Knaus, B. J., Weiland, J. E., Maia, C., et al. 2021. Phylogeography of the wide-host range panglobal plant pathogen *Phytophthora cinnamomi*. Molecular Ecology 30: 5164-5178.

Shan, H. L., Cang, X. Y., Qin, W., Li, W. F., Wang, X. Y., Zhang, R. Y., et al. 2021. Resistance to pokkah boeng disease in new and main sugarcane varieties cultivated in China. Euphytica 217: 194.

Somera, M., Massart, S., Tamisier, L., Soovali, P., Sathees, K., and Kvarnheden, A. 2021. A survey using high-throughput sequencing suggests that the diversity of cereal and barley yellow dwarf viruses is underestimated. Frontiers in Microbiology 12: 673218.

Song, J. Y., Yun, Y. H., Kim, J-D., Kim, S. H., Lee, S-J., and Kim, J. F. 2021. Genome analysis of *Erwinia amylovora* strains for a fire blight outbreak in Korea. Plant Disease 105: 1143-1152.

Susi, H. and Laine, A.-L. 2021. Agricultural land use disrupts biodiversity mediation of virus infections in wild plant populations. New Phytologist 230: 2447-2458.

Tafesse, S., Braam, C., van Mierlo, B., Lemaga, B., and Struik, P. 2021. Association between soil acidity and bacterial wilt occurrence in potato production in Ethiopia. Agronomy-Basel 11: 1541.

Tan, L., Zeng, W. A., Xiao, Y. S., Li, P. F., Gu, S. S., Wu, S. L., et al. 2021. Fungi-bacteria associations in wilt diseased rhizosphere and endosphere by interdomain ecological network analysis. Frontiers in Microbiology 12: 722626.

Tegene, S., Terefe, H., Dejene, M., Tegegn, G., Tena, E., and Ayalew, A. 2021. Survey of sugarcane smut (*Sporisorium scitamineum*) and association of factors influencing disease epidemics in sugarcane plantations of Ethiopia. Tropical Plant Pathology 46: 393-405.

Teston, A. L., Martínez, M. B., Madrid, A. J., Deblais, L., Taylor, C. G., Paul, P. A., et al. 2021. On-farm evaluations of anaerobic soil disinfestation and grafting for management of a widespread soilborne disease complex in protected culture tomato production. Phytopathology 111: 954-965.

Trad, M. and Taoueb, S. M. 2021. A critical review of pear genetic resources in Tunisia after the fire blight outbreak: risk assessment and geographical limits. Euro-Mediterranean Journal for Environmental Integration 6: 50.

Tsopelas, P., Soulioti, N., Wingfield M. J., Barnes, I., Marincowitz, S., Tjamos, T. C., et al. 2021. *Ceratocystis ficicola* causing a serious disease of *Ficus carica* in Greece. Phytopathologia Mediterranea 60: 337-349.

Wang, H., Mongiano, G., Fanchini D., Titone, P., Tamborini L., and Bregaglio, S. 2021a. Varietal susceptibility overcomes climate change effects on future trends of rice blast disease in Northern Italy. Agricultural Systems 193: 103233.

Wang, Z., Chen, B., Zhang, T., Zhou, G., and Yang, X. 2021b. Rice stripe mosaic disease: characteristics and control strategies. Frontiers in Microbiology 12: 715223.

Yoshida, N. 2022. Seasonal dynamics of the pink root fungus (*Septophoma terrestris*) in rhizosphere soil: effect of crop species and rotation. Plant Pathology 71: 361-372.

Yu, R., Luo, Y., Zhou, Q., Zhang, X., Wu, W., Ren, L. 2021. A machine learning algorithm to detect pine wilt disease using UAV-based hyperspectral imagery and LiDAR data at the tree level. International Journal of Applied Earth Observations and Geoinformation 101: 102363.

Zarco-Tejada, P. J., Poblete, T., Camino, C., Gonzalez-Dugo, V., Calderon, R., Hornero, A., et al. 2021. Divergent abiotic spectral pathways unravel pathogen stress signals across species. Nature Communications 12: 6088.

Zhang, Y., Dian Y., Zhou J., Peng, S., Hu, Y., Hu, L., et al. 2021. Characterizing spatial patterns of pine wood nematode outbreaks in subtropical zone in China. Remote Sensing 13: 4682.

**ELECTRONIC SUPPORTING INFORMATION S2. CORE ARTICLES ON MULIPLE PATHOGENS AFFECTING A CROP OR CROPPING SYSTEM IDENTIFIED IN STAGE 1 OF THE REVIEW OF PUBLISHED ARTICLES**

| **System** | **Hosts** | **Source** | **Location** |
| --- | --- | --- | --- |
| Aquaculture | Seaweed | Mateo et al. 2021 | Philippines |
| Cropping systems | Maize/soybean | Hampf et al. 2021 | Brazil |
| Crop-associated weeds | Annual and perennial species, many *Asteraeae* /Tobacco | Korbecka-Glinka et al. 2021 | Poland |
| *Capsella bursa-pastoris*/annual crops | Ahmed et al. 2021 | Canada |
| Many species, including wild basil and legumes/Phaeolus | Mwaipopo et al. 2021 | Tanzania |
| Forest/tree pathogens | Native and exotic trees, bamboo | Thu et al. 2021 | Vietnam |
| General: trees, forests, & plantations | Panzavolta et al. 2021 | Global |
| Forest tree seedlings | Spear & Broders 2021 | Panama |
| Nursery production systems | Avocado | Ramírez-Gill & Osorio, 2021 | Colombia |
| Major nursery crops | Weiland et al. 2021 | USA |
| Wild plants | Plant communities in meadows | Halliday et al. 2021 | Switzerland |

**References**

Ahmed, H. T., Francis, A., Clements, D. R., Dyck, E., Ross, N., Uphadhyaya, M. K., et al. 2021. The biology of Canadian weeds. 159. *Capsella bursa-pastoris* (L.) Medik. Canadian Journal of Plant Science 102: 529-552.

Halliday, F. W., Jalo, M., and Laine, A. L. 2021. The effect of host community functional traits on plant disease risk varies along an elevational gradient. eLife 10: e67340.

Hampf, A. C., Nendel, C., Strey, S., and Strey, R. 2021. Biotic yield losses in the southern Amazon, Brazil: making use of smartphone-assisted plant disease diagnosis data. Frontiers in Plant Science 12: 621168.

Korbecka-Glinka, G., Przybys, M., and Feledyn-Szewczyk, B. 2021. A survey of five plant viruses in weeds and tobacco in Poland. Agronomy-Basel 11: 1667.

Mateo, J. P., Campbell, I., Cottier-Cook, E. J., Luhan M. R. J. Ferriols, V. M. E. N., and Hurtado, A. C. 2021. Understanding biosecurity: knowledge, attitudes and practices of seaweed farmers in the Phillipines. Journal of Applied Phycology 33: 997-1010.

Mwaipopo, B., Rajamaki, M. L., Ngowi, N., Nchimba-Msolla, S., Njau, P. J. R., Valkonen, J. P. T., et al. 2021. Next-generation sequencing-based detection of common bean viruses in wild plants from Tanzania and their mechanical transmission to common bean plants. Plant Disease 105: 2541-2550.

Panzavolta, T., Bracalini, M., Benigno, A., and Moricca, S. 2021. Alien invasive pathogens and pests harming trees, forests, and plantations: pathways, global consequences and management. Forests 12: 1364.

Ramírez-Gill, J. G., and Osorio, J. G. M. 2021. Source of inoculum of pathogens, the origins of disorders and diseases management in avocado nurseries. Australasian Plant Pathology 50: 457-468.

Spear, E. R. and Broders, K. D. 2021. Host-generalist fungal pathogens of seedlings may maintain forest diversity via host-specific impacts and differential susceptibility among tree species. New Phytologist 231: 460-474.

Thu, P. Q., Quang, D. N., Chi, N. M., Hung, T. X., Binh, L. V., and Dell, B. 2021. New and emerging insect pest and disease threats to forest plantations in Vietnam. Forests 12: 1301.

Weiland, J. E. 2021. The challenges of managing Phytophthora root rot in the nursery industry. Plant Health Progress 22: published on line 12 Sep 2021.

**ELECTRONIC SUPPORTING INFORMATION S3. ADDITIONAL VISUALISATIONS**

**Reprojections of the maps in the main text on a country-by-country basis**


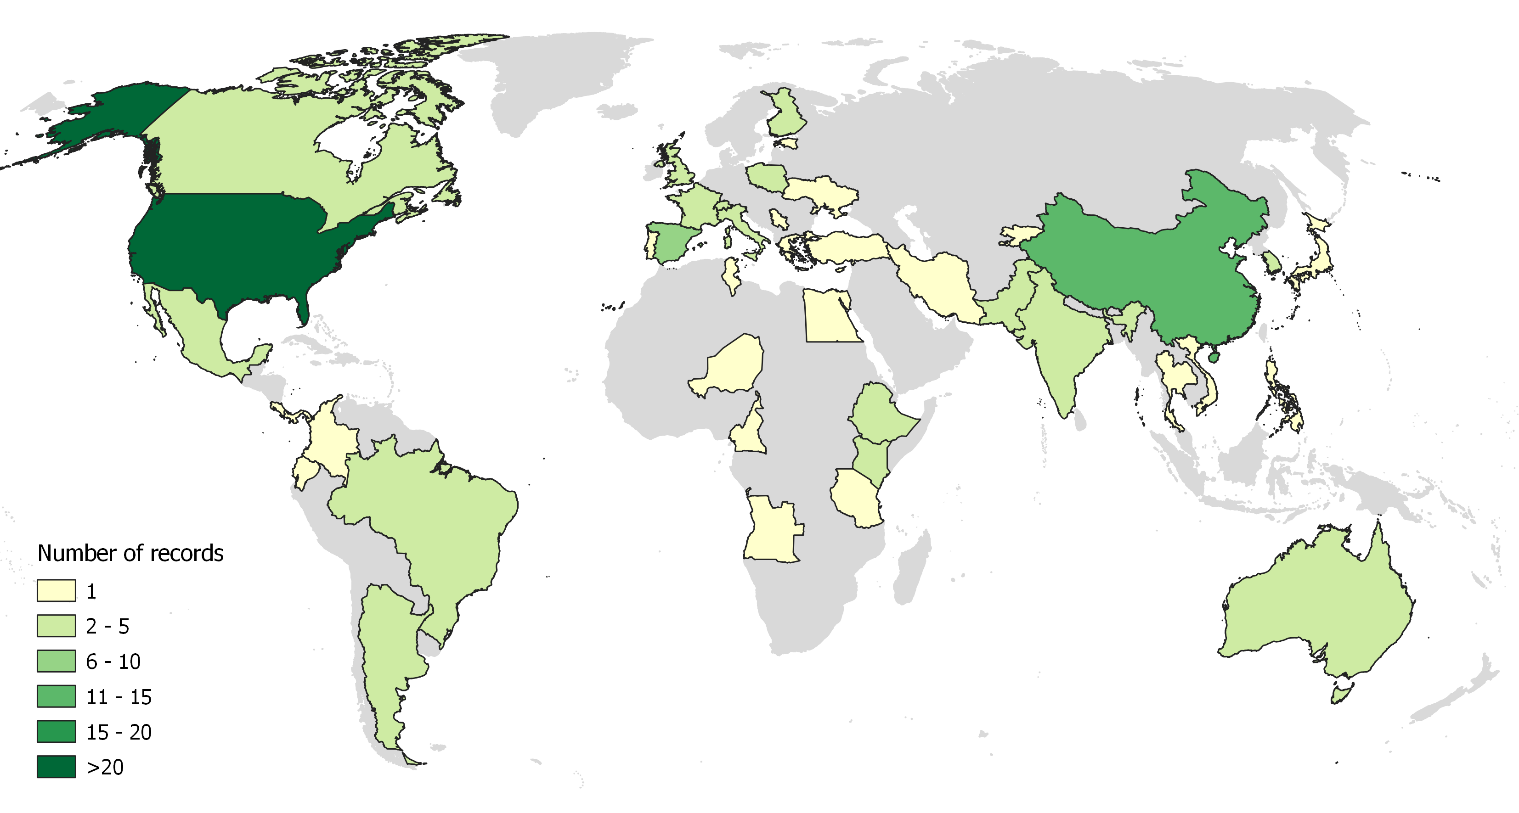


**Figure S3-1.** **Map showing locations relevant to core articles on single named species and multiple pathogens identified in Stage 1 of the review of published articles on disease outbreaks and epidemics.** This reprojects the results shown in Figure 4 of the main text, but on a country-by-country basis. 7 reports recorded at higher geographic levels (e.g., continent) are omitted.


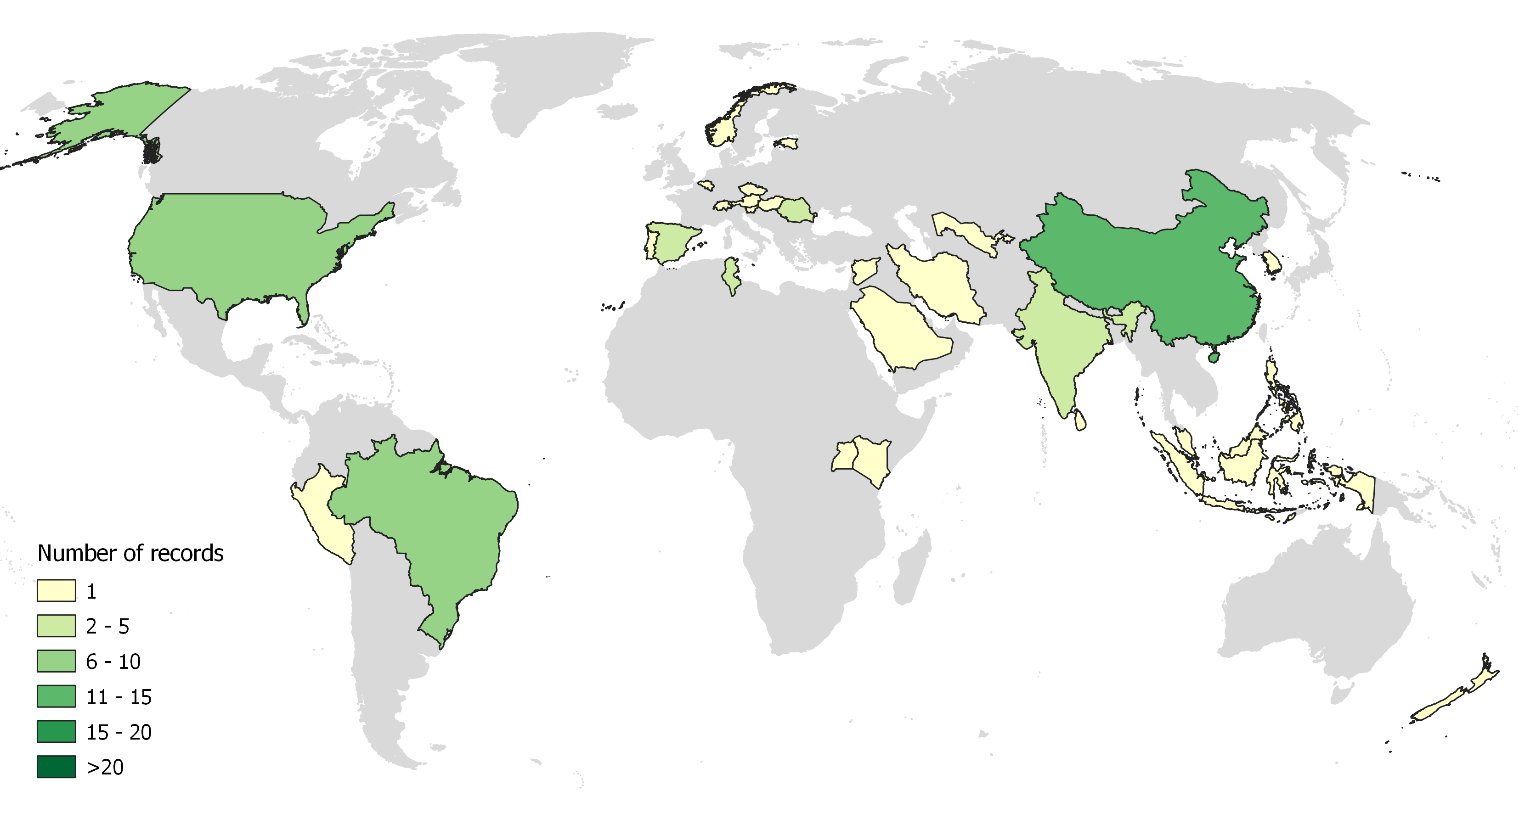


**Figure S3-2**. **Map showing locations of new pathogen records reported in 2021 in the CABI Distribution Database following manual review.** This reprojects the results shown in Figure 7 of the main text, but on a country-by-country basis.


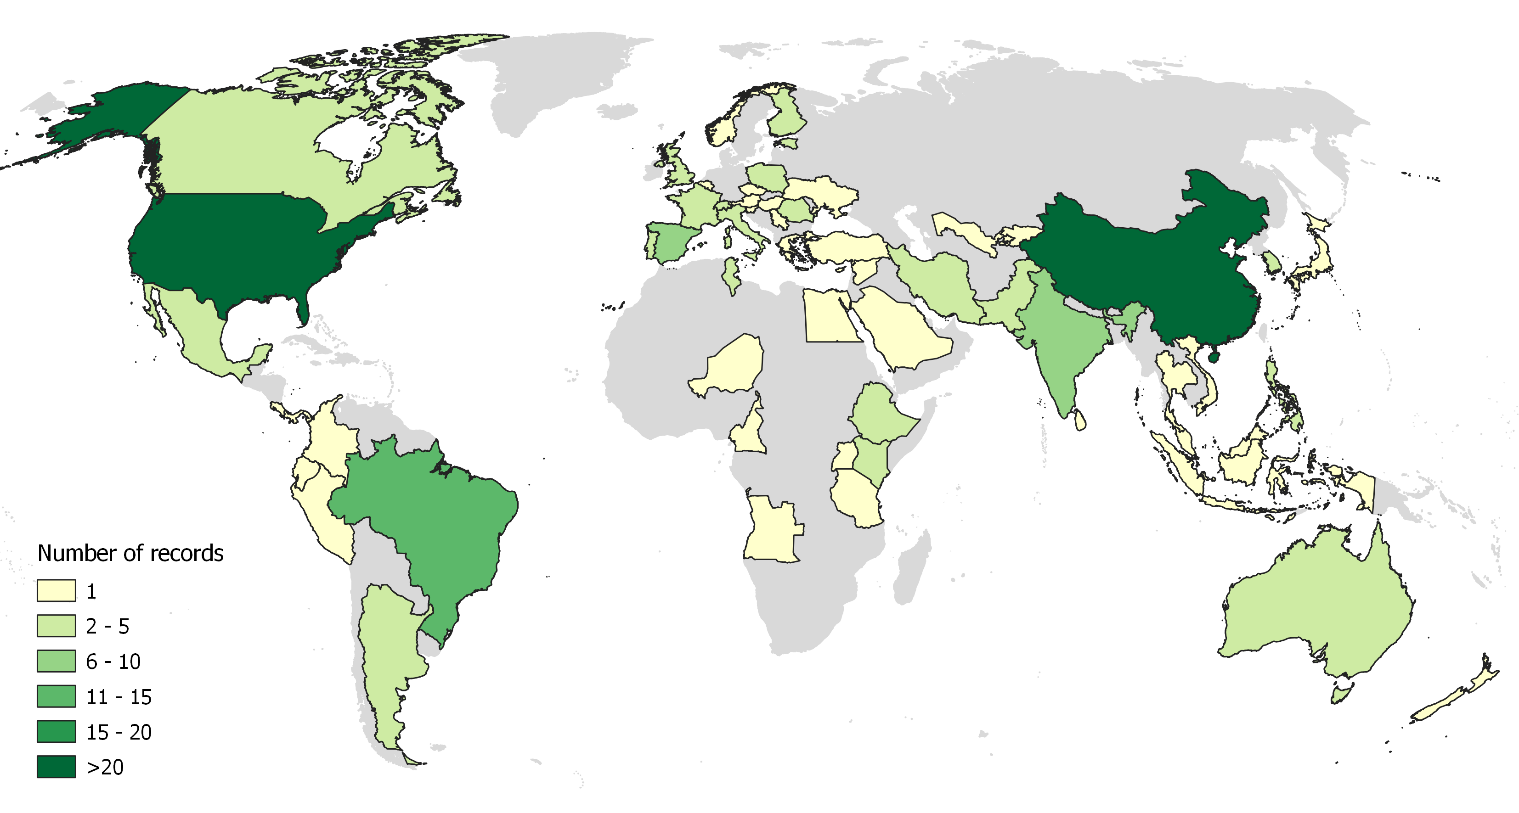


**Figure S3-3. Map showing combined locations of new pathogen records reported in 2021 from both the literature review and from the CABI Distribution Database (following manual review).** This reprojects the results shown in Figure 8 of the main text, but on a country-by-country basis.

**Maps showing results of the automated process to locate records in the CABI DBB**


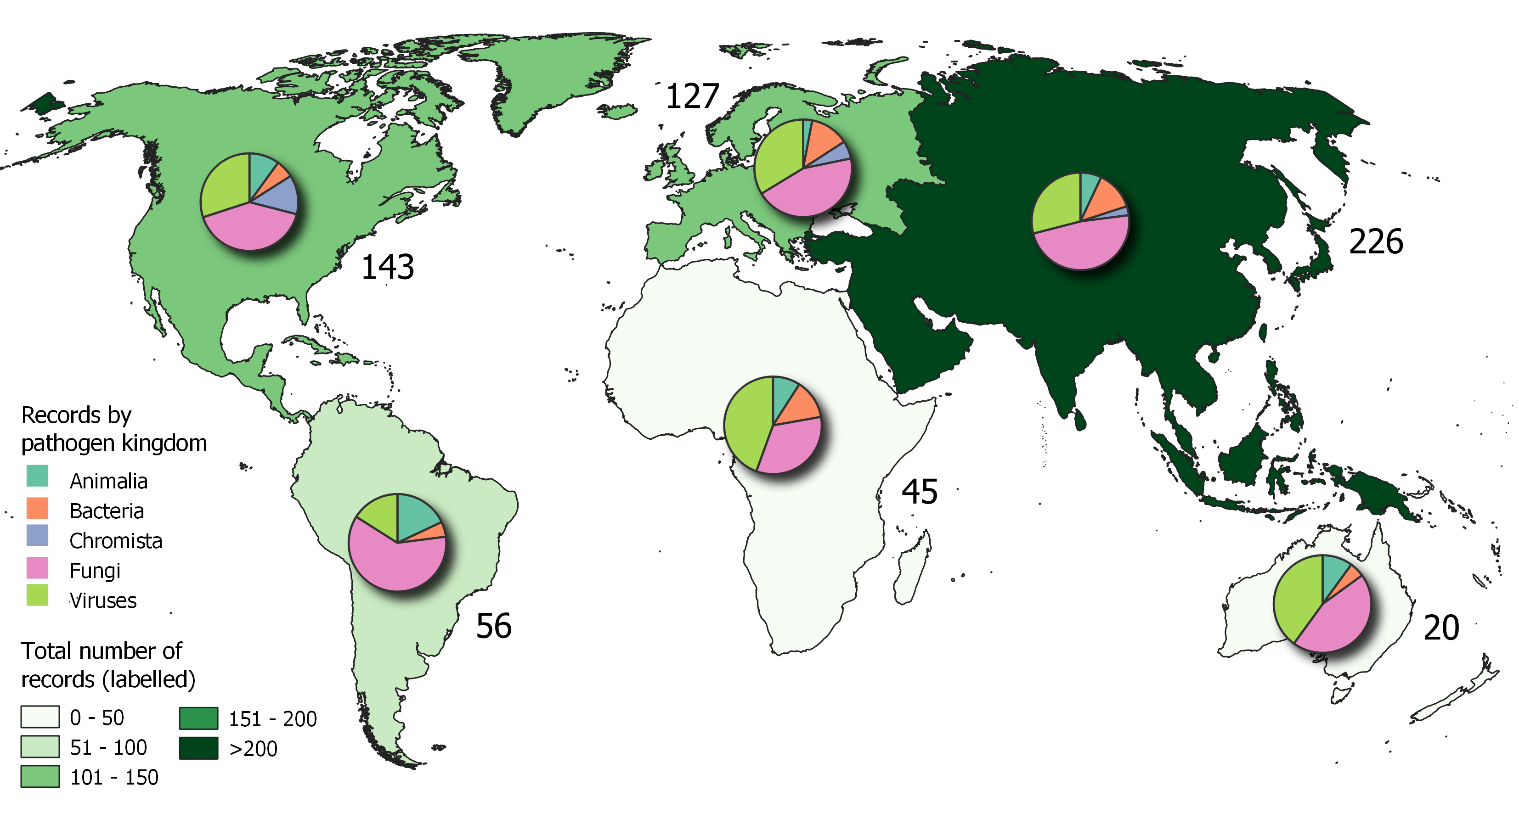


**Figure S3-4. Map showing locations of new pathogen records reported in 2021 in the CABI Distribution Database (DBB) based on the automated process.** Counts at a DBB geolocation level are summarised by continent, with a breakdown of pathogen type by kingdom.


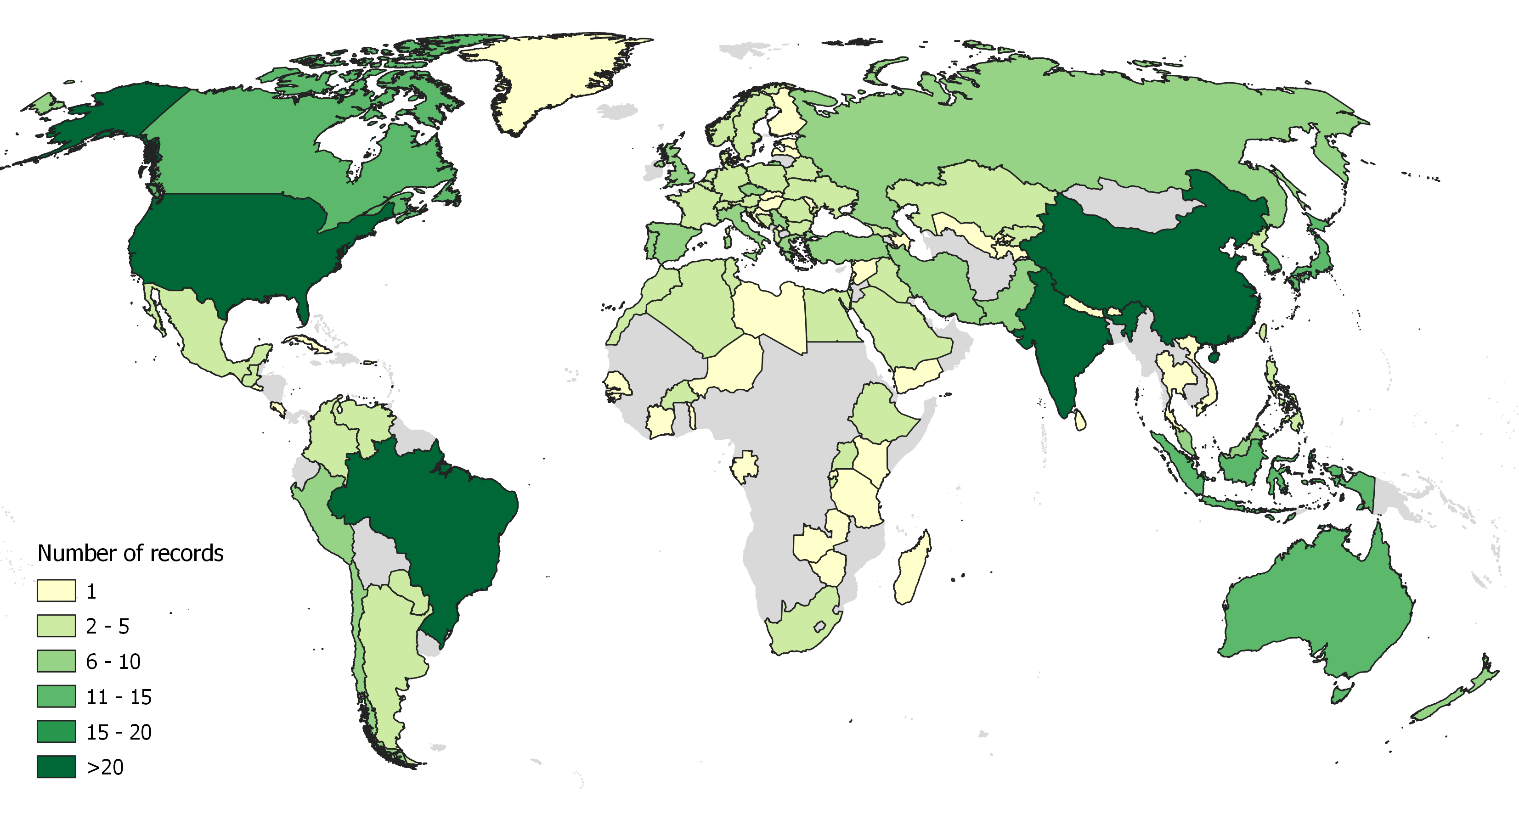


**Figure S3-5.** **Map showing locations of new pathogen records reported in 2021 in the CABI Distribution Database based on the automated process**. This reprojects the results shown in Figure 4 above, but on a country-by-country basis.

**ELECTRONIC SUPPORTING INFORMATION S4. TIMELINE FOR SURVEYS**

A summary of the timeline for surveys of single named pathogen species collated in Table 1 in the main text is summaries in visual form below and is partitioned by pathogen in more detail in the table that follows.


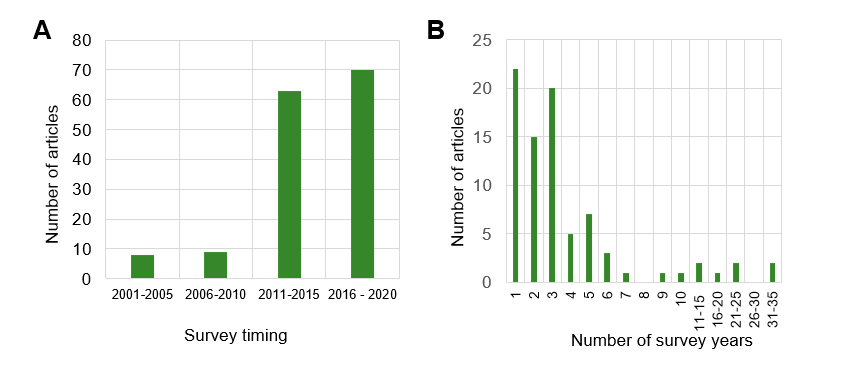


Figure ES4-1. The timing and extent of the surveys of single named pathogen species. A – The timing of the surveys grouped by 5-year intervals. B – The number of survey years reported in studies.

| **Years** | **2001-2005** | **2006-2010** | | **2011-2015** | | **2016 - 2020** |
| --- | --- | --- | --- | --- | --- | --- |
| **Bursephalenchus xylophilus** | | | | | | |
|  | | | | | | Atkins 2021 (2018 – 2019)  Yu et al. 2021 (2020)  Zhang et al. 2021 (2017 – 2019)  Chu et al. 2021 (2019) |
|  | Hao et al. 2021 (2000-2018) | | | | | |
| **Candidatus Liberibacter asiaticus** | | | | | | |
|  | | | | | | Garcia-Figuera et al. 2021 (2019)  Oliveira et al. 2021 (2019)  Shrestha et al. 2022 (2019)  Ghosh 2021 (2018 – 2019)  Vincent 2021 (2019) |
|  | | | | Om et al. 2021 (2013 – 2016) | | |
| Bibi et al. 2021 (2011 – 2013) | |  |
|  | | Morán et al., 2021 (2009-2018) | | | | |
| **Casava mosaic viruses** | | | | | | |
|  | | | | | | Munguti et al 2021 (2018 – 2020)  Saokham et al. 2021 (2018 – 2019)  Katono et al. 2021 (2016 – 2017)  Eni et al 2021 (2017)  Soro et al. 2021 (2016 – 2017) |
|  | | | | Eni et al.2021 (2015)  Mugerwa et al 2021 (2013) | |  |
| Szyniszewska et al. 2021 (2015 – 2017) | | |
| **CItrus tristeza virus** | | | | | | |
|  | | | | | Pais da Cunha et al. 2021 (2017)  Liu et al. 2021 (2018-2019) | |
|  | | | | Park et al. 2021 (2013-2018) | | |
| Datta et al. 2021 (2015)  Llanes-Alvarez et al. 2021 (2012-2015) |  | |
| **Erwinia amylovora** | | | | | | |
|  | | | | | Doolotkeldieva et al. 2021 (2018-2019)  Ozturk & Soylu 2021 (2018-2019)  Dougherty et al. 2021 (2020)  Singh et al. 2021 (2020)  Gschwend et al. 2021 (2017) | |
|  | | | | Song et al. 2021 (2015-2018)  Trad & Tauoeb 2021 (2015-2019) | | |
| **Fusarium spp complexes** | | | | | | |
|  | | | | | Shan et al. 2021 (2016-2019)  Nawaz et al. 2021 (2017-2019)  Srimali2021 (2019) | |
|  | | | | Bekele et al. 2021 (2015-2016) | | |
| ***Fusarium oxysporum* f.sp *cubense*** | | | | | | |
|  | | | | | Heck et al. 2021 (2016-2017) | |
| **Magnaporthe oryzae** | | | | | | |
|  | | | | | He et al. 2021 (2017-2019) | |
|  | | | | Pordel et al. 2021 (2012-2016) | | |
| Mills et al. 2021 (2015)  Wang et al. 2021b (2013-2015) |  | |
|  | Pak et al. 2021 (2003-2014) | | | |
| **Maize lethal necrosis** | | | | | | |
|  | | | | | Regassa et al. 2021 (2016-2017)  Nei 2021 (2019) | |
|  | | | | de Groote et al. 2021 (2013-2018)  Eunice et al. 2021 (2015-2019) | | |
| Richard et al. 2021 (2014-2015) |  | |
| **Meloidogyne spp** | | | | | | |
|  | | | | | Teston et al. 2021 (2016-2018)  Evlice 2021 (2018-2019)  Naz et al. 2021 (2017-2019)  Marquez et al. 2021 (2018)  Sabri et al. 2022 (2017-2018) | |
|  | | | | Ramzan et al. 2021 (2013-2016) | | |
| **Pseudomonas syringae pvs** | | | | | | |
|  | | | | | Ares et al. 2021 (2018-2020) | |
|  | | | | Ilicic et al. 2021 (2013-2015)  Lee et al. 2021 (2013-2014) |  | |
|  | Kant et al. 2021 (1982-2016) | | | | | |
| ***Puccinia striiformis* f.sp *tritici*** | | | | | | |
|  | | | | | Esmail et al. 2021 (2018-2020)  Sandhu et al. 2022 (2020)  Chen et al. 2021 (2018)  Chen et al. 2021 (2016-2018) | |
|  | | | | Gangwar et al. 2021 (2015-2019) | | |
|  | Perronne et al. 2021 (1985-2018)  Turner et al.2021 (1999-2019) | | | | | |
| **Xylella fastidiosa and vectors** | | | | | | |
|  | | | | | Lazaro et al. 2021 (2017-2019)  Beal et al. 2021 (2016-2018)  Bodino et al. 2021 (2016-2018)  Olmo et al. 2021 (2016-2020)  Lombardo et al. 2021 (2020)  Godefroid et al. 2022 (2019) | |
|  | | | | Gargani et al. 2021 (2015-2019)  Poblete et al. 2021 (2011-2017)  Zarco-Tejada et al. 2021 (2011-2019)  Frem et al. 2021 (2015-2019) | | |
| *Zymoseptoria tritici* | | | | | | |
|  | | | | | Beyer et al. 2022 (2017-2019)  Orellana-Torrejon et al. 2022 (2017-2019) | |
|  | | | | Bartosiak et al. 2021 (2015-2020)  Justesen et al. 2021 (2015-2017) | | |
|  | Garnault et al. 2021 (2004-2017)  Turner et al. 2021 (1999-2019) | | | | | |
| Dutta et al. 2021 (1999-2001) | |  | | | |

**ELECTRONIC SUPPORTING INFORMATION S5. DISEASE OUTBREAKS AND EPIDEMICS OF SINGLE NAMED PATHOGENS**

***Objective 1. Literature review of published articles on disease outbreaks and epidemics (single named pathogens)***

The following sections summarise the results for named pathogens identified by the literature review (see Table 1 in the main text; top section), reporting pathogens in alphabetical order.

*Bursephalenchus xylophilus*

*Bursephalenchus xylophilus,* the pine woodnematode (PWN) affects *Pinus*, causing pine wilt disease. The organism is native to North America and has spread to Asia and more recently to Europe.

Core articles – Electronic Supporting Information, S1:

A survey was made to determine the occurrence of PWN and its beetle vectors (*Monochamus* spp.) on the native *Pinus ponderosa* in Colorado, USA, over two years and in forests (32 sites) and urban settings (12 settings) (Atkins et al., 2021). There was much variation in the incidence of PWN with many host trees not displaying symptoms; overall, the incidence of the nematode in sampled pines and beetles was about 4%. The nematode was found to be associated with *Monochamus clamator* for the first time in the USA. The results indicated that natural forests are natural reservoirs of PWN, especially with previous wildfires, with beetles moving to urban areas late in the growing season.

Detection of PWN was conducted using UAV (unmanned aerial vehicle) based hyperspectral imaging, light detection and ranging (LiDAR) techniques. PWN was reported in a forested area of approximately 55700 ha, in Zhejiang province of China (Yu et al. 2021). The predominant tree species was *P. massoniana*. Field observations on individual trees were made in October 2020 with five infection classes recorded based on needle coloration, growth vigour, and secretion of resin. The combination of UAV and LiDAR gave an overall accuracy of about 74% in predicting the infection class.

Airborne imagery and ground surveys were used to characterise the spatial pattern of PWN outbreaks in Hubei province of China (Zhang et al. 2021). The forested area of almost 70000 ha is covered predominantly by *P. massoniana* and P. *elliottii*. Sentinel-2 L2A level image data was used to derive vegetation indices. Georeferenced information on topographical and forest type variables was assembled from the local forestry administration and the US Geological survey. The number of dead PWN trees sampled was about 19000 with an equivalent number of randomly selected points where PWN was absent. A range of machine learning models was used to predict the probability of PWN occurrence in the region based on constructed explanatory variables. The best fitting model had a detection rate of 96% but with a high “false alarm rate” (27%) when correcting for omission errors caused by the PWN-absent points. Explanatory variables based on elevation and vegetation indices were most important in predicting PWN but also important were variables describing human activity.

Supplementary articles:

Some 180 strains of *B. xylophilus*, each consisting of about 40 individual nematodes from a single chopped tree, were collected from infected trees in 16 Provinces across China (Ding et al. 2021). Strains were cultured to obtain a sufficient sample size and used for sequencing and SNP genotyping, with a geographical location prediction model used to analyse genomic variation. It was found that the *B.xylophilus* population in China can be divided into distinct subpopulations with some interchange through migrations, suggesting that the nematode has been adapting to different temperature zones and that survival may be greater at lower temperatures than previously anticipated.

The spatiotemporal pattern of pine wilt disease in the Yangtze River Basin has been analysed based on statistical data obtained from the State Forestry and Grassland Administration of China covering the years 2000 to 2018 (Hao et al. 2021). Pine wilt in this area showed an “increase-decrease-increase” trend with a massive increase in 2018. Spatial trends showed a sequence of jumps to multiple outbreak locations moving west along the river, with large clusters of pine wilt disease forming across four regions of the river basin. This form of analysis was repeated across China and showed strong concentrations and spatial correlations of the disease in south-eastern part of the country (Hao et al. 2022). The direction of spread was from south to north and from coastal to inland areas, with clusters forming following the pattern “spread-stabilization-outbreak-major outbreak” at this larger spatial scale.

The community diversity of xylophagousbeetles at different stages of PWN infections was studied in *P. massaniana* and *P. thunbergia* forests in Fujian and Shandong provinces of China respectively (Chu et al. 2021). A total of 27 PWN-infected trees were cut to the ground at each site and all beetles present in the whole tree were collected and identified to species. Beetle diversity was significantly higher on *P. massaniana* than on *P. thunbergia* and varied with infection class (initial, dying, and terminal). *M. alternatus*, an important vector of PWN, occupied a large niche with different aggregation patterns at the three infection classes. It was concluded that diversity and competitive interactions among xylophagous beetles may be involved in regulating their population dynamics.

*Candidatus* Liberibacter asiaticus and vectors (*: see also results of Objective 2)

*Ca.* Liberibacter asiaticus is the causal agent of huanglongbing disease of citrus, also known as citrus greening disease. The bacterium is vector-borne by psyllid species *Diaphorina citri* and *Trioza erytreae.*

Core articles – Electronic Supporting Information, S1:

The Asian citrus psyllid *Diaphorina citri* is a vector of the phloem-limited bacterium *Ca.* Liberibacter asiaticus (CLas), the pathogen causing Huanglongbing disease of citrus. Population dynamics of the psyllid were monitored in two study locations at the University of Faisalabad (UAF), Pakistan (Bibi et al. 2021). At each location, 15 trees each of *Citrus sinensis sensu lato* and *C. reticulata* were selected randomly for population monitoring population numbers at weekly intervals from March 2011 to 2013. Daily standard meteorological data were recorded at the meteorological observatory at UAF. Three models were used to predict the population dynamics of the psyllid based on multiple linear regression, classification with decision trees, and neural networks. The neural network-based model gave the best predictions of eggs, nymphs, and adults over the monitoring period.

The African citrus psyllid *Trioza erytreae* vectors *Ca*. Liberibacter africanus (CLaf) and can also vector CLas, also causing Huanglongbing disease, and has spread to parts of Asia and Europe. To determine whether the environment in Mexico would be suitable, an ecological niche modelling approach was used based on distribution points for the vector in Africa obtained from the scientific literature and the Global Biodiversity Information Facility, Natural History Museum, London, databases (Espinoza-Zaragoza et al., 2021). A total of 122 data points was obtained, split for training the model and subsequent evaluation. The same data base was used to map the distribution of white sapote crops (*Casimiroa edulis*) on which the vector can feed. The citrus-growing areas of Mexico were found to have environmental suitability for *T. erytreae*, matched by the distribution of *C. edulis*, and with connectivity to ports, potential pathways of entry for the psyllid.

Huanglongbing (CLas) was detected in California in 2012, and to prevent the spread of the bacterium to commercial citrus groves, growers have formed a voluntary code of best management practice (Garcia-Figuera et al. 2021). This study evaluated the take-up of these practices by the citrus industry, based on grower surveys and a novel approach using multivariate ordinal regression. Part of the grower surveys referred to monitoring practices, with most respondents favouring scouting for the psyllid and surveys, but not making use of early detection methods that could precede the statutory qPCR tests.

Supplementary articles:

Participatory citrus grower surveys of HLB aimed at diagnosis have also taken place in Bahia, Brazil, where *D. citri* is present but the disease is currently absent and phytosanitary preparedness is considered possible only through grower participation (Oliveira et al. 2021).

Population fluctuations of *D. citri* and its natural enemies were monitored from March to December 2019 at two separated sites in Florida (Shrestha et al. 2022). Twenty trees were selected randomly from four pairs of organic and intermittently managed groves. Sentinel psyllids were placed on caged branches and counts of all beneficial arthropods were made for 2 mins at each sampling period. Adult psyllids were in stem-tap samples taken every 3 weeks from May to September. The study was mainly motivated by the need to look at different management practices, including pesticide spraying. Intermittent spraying did affect the activity of natural enemies but did not eliminate their populations. Importantly for Europe, *D. citri* was found in Israel for the first time in July 2021.

Early decline of fruit-bearing Mandarin (*C. reticulata*) and low productivity have proved to be a major concern in Bhutan, despite favourable conditions for citrus cultivation (Ghosh et a., 2021). Surveys were made of the incidence of HLB and citrus tristeza virus in four main citrus growing regions by taking leaf samples from healthy and declining trees showing symptoms of greening- and tristeza-like symptoms from different orchards of southern Bhutan. From a total of 51 samples, 36 were positive for CTV and 14 for HLB, using PCR-based diagnosis and genetic markers. There was a high level of mixed infections, all but one of the positives for HLB tested positive for CTV. The relationship between the natural occurrence of HLB, vectors and environmental conditions in Bhutan showed that the presence of *D. citri* was the most important factor, moderated by unfavourable environmental conditions and altitude (Om et al. 2021).

In many cases, the detection of plant pathogenic bacteria is made from samples of different environmental origin: soils and plant debris, living plants, and insects. Diagnosis of HLB using standardised RT-PCR methods was attempted from samples taken from plants, psyllid vectors, and parasitoids of the psyllid (Morán et al., 2021), a total of 4915 samples. A total of 2783 samples were taken from asymptomatic plants collected in surveys made between 2009 and 2018 in Spain. A total of 1052 samples of *T. erytreae* specimens came from colonies established on citrus plants in the greenhouse, and 1081 samples were of the parasitoid *Tamarixia dryi* introduced as a classical biological agent against *T. erytreae* and maintained in colonies at a Research Institute in the Canary Islands. The results showed that about 9% were amplified using a first rapid screening test, reduced to 0.03% using more specific tests. Most amplifications were associated with parasitic wasps. New primers external to target regions of the RT-PCR protocols were designed and showed that all amplifications came from other procaryotic organisms in the samples, not from *Ca.* Liberibacter spp.

Feral citrus trees are found as understory plants in forested areas in Florida. A survey was made of feral grapefruit (*Citrus x paradisi*) in wooded areas, mostly hardwood trees, elevated above surrounding wetlands and close to three commercial citrus groves, heavily infested with HLB (Vincent et al., 2021). Measurements of overstory shading above the grapefruit trees and understory daily incident radiation, *D. citri* detections using sticky traps, and CLas detections using RT-PCR, were all made. In addition, some phytochemical and physiological measurements were made. The main conclusion from the study was that the naturally shaded understory environment greatly inhibits HLB by deterring the arrival of the vector and enhances the survival of feral citrus by improving the photosystem-II performance. Given these results, further work is required to investigate the potential of shade in horticultural systems to reduce disease transmission by vectors and enhance plant growth. A review of potential control methods against HLB (Li and Nangong, 2022) covers genetic improvement, thermotherapy and tissue culture for propagating material, eradication of infected trees, vector control, physical methods including mobile thermotherapy of trees, and biological control of the vector. Precision trunk injection technology to deliver antibiotics or pesticides is proposed as a promising method to control HLB.

Cassava mosaic viruses and vectors

Cassava mosaic virus is the common name of 11 different virus species pathogenic on cassava belonging to the genus *Begomovirus*. The virus is transmitted by the *Bemisia tabaci* species complex.

Core articles – Electronic Supporting Information, S1:

The whitefly *Bemisia tabaci* is the vector for many important crop viruses globally. It is a species complex with more than 40 species that are indistinguishable by morphology and that attack a wide range of plant hosts. More than 300 plant viruses are transmitted by *B. tabaci*, including the two most important viruses of cassava in sub-Saharan Africa, cassava mosaic virus(es) and cassava brown streak virus. A specific ‘cassava-type’ of the whitefly is unique to cassava. A survey was made between July 2018 and July 2020 to determine the whitefly species present at sites in coastal, eastern, central, and western regions of Kenya (Munguti et al. 2021). The number of sampled sites depended on the number of cassava fields found in each region. At each sampled site, 5-10 adults were collected from 10 randomly selected cassava plants (a total of 76 specimens) and kept for molecular analysis, genotyping, and phylogenetic analysis. Three *B. tabaci* groups were found, two previously classified as sub-Saharan groups of putative species, and one Indian Ocean group not thought previously to colonise cassava.

In Africa, at least nine species of cassava mosaic virus have been recognised. In India only two are known. Indian cassava mosaic virus (ICMV) and Sri Lankan casava mosaic virus (SLCMV), with the latter emerging in Southeast Asia in 2015 (Saokham et al. 2021). In this study, a survey was made for cassava mosaic disease caused by SLCMV in five cassava-producing provinces of Thailand adjoining the Cambodian border from October 2018 to July 2019. Some 201 cassava fields in plantations covering an area of 458 ha were sampled across the five provinces. Thirty cassava plants were sampled from a 1-ha area with leaves collected for PCR detection. A comprehensive set of disease assessment scores was compiled: prevalence, based on percentage of fields infested; incidence, based on percentage of leaves with symptoms; severity, calculated from five defined severity class; and a ‘latent’ infection score, based on percentage of asymptomatic plants. An attempt was made to differentiate symptoms arising from cutting transmission (whole plant symptoms) from vector transmission (top leaves only). The number of whiteflies on the five topmost leaves of each sampled plant was also counted. Cassava mosaic disease (CMD) prevalence ranged from 19 to 80% of fields across the five provinces, incidence ranged from about 1 to 43% of leaves with average severities per plant ranging from mild chlorosis to moderate mosaic. Asymptomatic plants ranged from 0 to 12% following PCR analysis. Phylogenetic analysis showed a close similarity of the virus isolates with SLCMV isolates from Vietnam and Cambodia. About 95% of infection was estimated as due to whitefly transmission rather than through infected stem cuttings, the original source of infection.

Supplementary articles:

A greater understanding is required of the diversity of the *B. tabaci* species complex, the prevalence and host range of cryptic species, and the consequences for transmission of viruses. Some weeds are known to harbour cassava *B. tabaci*. Whitefly adults were collected on crops and weeds in fields from July to August 2013 in Uganda (Mugerwa et al., 2021). Sites were selected based on observations of whiteflies on crops and wild weeds along the main and rural roads at intervals of 10-20 km, with digital photographs taken of weeds to aid subsequent identification. A total of 59 plant species were identified with 25 unidentified weeds. Three individual whiteflies from the stored samples were selected for DNA extraction, PCR amplification, identification of artefacts in the sequences obtained, phylogenetic analysis, and a hierarchical cluster analysis to infer host range profiles. Sixteen *B. tabaci* putative species were identified, three of which are proposed as novel. The most prevalent whiteflies were classified as *B. tabaci* MED-ASL (non-cassava type), sub-Saharan Africa 1 (the cassava type), and Bemisia Uganda1 (associated with sweet potato) and these whiteflies were the most polyphaghous. Multiple species occurred on some crop plants and weeds, and these plants may have the potential to be reservoirs for mixed virus infections.

The *B. tabaci* species complex also causes direct pest damage to cassava when present in large numbers. Field studies were made in 2016 and 2017 at two or three sites, respectively, with contrasting rainfall patterns (unimodal or bimodal) and different historical levels of whitefly abundance (Katono et al., 2021). The aim was to understand better how environment, cassava genotype and their interactions give rise to the increased abundance of *B. tabaci*. The overall conclusion across these factors was that temperatures of 28-30 C, rainfall in the range 30-15-mm, RH of 55-70%, and deployment of cassava genotypes with low height and large leaf area and lobe width significantly increases population growth of *B. tabaci*.

A TAS-ELISA for SLCMV detection in southeast Asia has been developed in Thailand and was shown to have 99.6% accuracy and 100% when tested with stem cuttings derived from 490 field samples collected between 2018 and 2019 (Charoenvilaisiri et al. 2021). The status of cassava mosaic disease caused by SLCMV in Southeast Asia has been reviewed (Uke et al. 2021). Following outbreaks in several countries, systems of healthy seed and distribution networks have been developed, combined with CMD-resistant planting material, although no information was given on the spatial coverage.

Field surveys were made in 2015 (184 farms) and 2017 (328 farms) to determine the incidence of African cassava mosaic virus (ACMV) and East African cassava mosaic virus (EACMV) across 12 Nigerian States and the Federal Capital Territory (Eni et al. 2021). Cassava farms were surveyed at about 10 km distances depending on their scattered distributions. At each farm, 30 cassava plants were assessed visually for foliar symptoms, whiteflies were counted on the topmost five leaves, and an average of four leaves was collected at each farm for ACMV and EACMV detection using PCR analysis. In total, more than 1300 cassava leaf samples were taken and analysed. In both years, the estimated proportion of cutting transmission was high, about 75% across the surveyed regions. ACMV in single infections was present in 74% of samples in 2015, in 50% of samples in 2017. EACMW in single infections was less than 1% in both years but the incidence of mixed infections was close to 5% in both years. Data were also aggregated according to north-west (lower overall incidence) and south-west (higher overall incidence) regions of Nigeria.

Surveys were carried out in 2016 and 2017 in multiple sites across eight cassava growing regions of Burkina Faso to ascertain the status of CMD in the country and the cassava mosaic viruses involved using field observations of symptoms and phylogenetic analysis (Soro et al., 2021). Disease incidence and severity varied across locations with CMD incidences ranging from 6-52% and symptom severities based on a score scale from mild to moderate. In all but one of the regions, cutting-borne infections were higher than whitefly-vectored infection. PCR and sequencing analysis of 687 samples across both years (452 with symptoms, 235 without) showed almost 80% of symptomatic samples to be ACMV-like and 1% to be EACMV-like in single infections, with almost 20% to be co-infected. Most of the EACMV-like positives were found to be East African cassava mosaic Cameroon virus, one of several EACMV-like viruses.

A survey was made of 96 smallholder cassava growers across five provinces of Zambia between 2015 and 2017 where cassava mosaic viruses had previously been reported (Szyniszewska et al. 2021). Accessible roadside fields along main roads at 10-15 km distances were used for the field-owner surveys which consisted of questionnaires and structured interviews. Participants were questioned on their awareness of CMD, symptom recognition, presence in their fields, and how the disease spread. Fields were separately assessed for the incidence and severity of disease, and 208 leaf samples were taken from the 96 fields for virus detection. Symptoms of CMD were observed in more than 80% of fields with an average incidence of about 50% within fields. No symptoms of cassava brown streak disease were observed. Most growers used planting material from their own (94%) fields or from adjacent fields. Only 48% of growers received information on or access to the use of certified clean planting material.

The historical genome of a 90-yr-old ACMV was reconstructed from small RNA sequences in an herbarium specimen (Rieux et al., 2021). Evolutionary divergence times estimated with the historical genome were significantly higher than those estimated without and are more in accord with historical disease records.

Citrus tristeza virus (*: see also results of Objective 2)

Citrus tristeza virusis a virus species of the genus *Closteroviridae*, causing economic damage to host plants of *Citrus* and related genera. The virus is transmitted by a range of aphid vectors, the most efficient being *Toxoptera citricida*.

Core articles – Electronic Supporting Information, S1:

Citrus plants from eleven sources located in nurseries and an orchard in Angola were surveyed for the presence of citrus tristeza virus (CTV) using random-primed RNA-seq and multiple molecular marker amplification for the main CTV strains (Pais da Cunha et al., 2021). A wide range of strains was found to be present in the surveyed citrus locations, including some close to known severe strains as well as emerging strains in California and Uruguay. Much of the knowledge of the diversity of CTV strains comes from work on commercial citrus, with little known of virus diversity in wild citrus (Liu et al. 2021). Analysis was made of RNA libraries from wild citrus samples from the Ailao mountains of central Yunnan province, China. Some 44 virus isolates were found including CTV and other putative virus species within the *Closteroviridae*, with the frequent occurrence of recombination across members of the family. Novel viruses within the family may emerge from wild citrus as pathogens and stresses the need for surveillance of their pathological and epidemiological characteristics.

Supplementary articles:

Citrus is affected by many viruses and viroids, some of which are widespread throughout citrus-growing countries, with some restricted to individual countries and regions. Virus isolates and source plants originating from China and Sicily and previously testing positive for CTV were used to generate small RNA libraries and sequenced using high throughput sequencing to assemble virus genomes, followed by bio-indexing (Licciardello et al., 2021). The HTS procedures were able to detect mixed CTV variants from plant samples but not non-EU variants, a key requirement for quarantine surveillance in the EU.

Local varieties of Mandarin orange (*C. reticulata*) in remote areas of Arunachel Pradesh, India, have been found in surveys to be in severe decline associated with aphid infestations (Datta et al. 2021). Four orchards showing poor health and symptoms of citrus tristeza virus infection were surveyed by taking 40 leaf samples in a stratified design and aphid samples (50-60 specimens per orchard). Leaf samples were subjected to RT-PCR methods for CTV detection, with genetic regions subsequently amplified and clonally sequenced. Phylogenetic analysis showed close affinity and clustering with ‘western lineages’, distinct from sequences found elsewhere in India and neighbouring countries. The evidence suggested that the ancestral western strain originated in the north-eastern region of India, part of the Indo-Burma biodiversity hot spot, with a relatively recent introduction to Europe, Africa, and the Americas (400-500 years ago). The ancestral stain diversified and spread to south-eastern Asia and elsewhere in India to form the Asian and Indian lineages.

CTV-positive leaf samples were collected from symptomatic trees during surveys in the upper Gulf Coast area of Texas from Corpus Christi to the Louisiana border from 2013 to 2018 (Park et al., 2021) with 36 samples analysed by strain-specific RT-PCR and then by amplicon sequencing of genomic regions. Variability in strain diversity observed over this 6-year period confirmed the presence of multiple strains in the samples, albeit with some inconsistent genotypic data. CTV was first reported in Texas in the mid-1950s, and the authors suggest that the current strain diversity has resulted from multiple introductions of CTV-infected propagation material since that time.

Disease caused by CTV can also be affected by changes in citrus management following outbreaks of other diseases. In Cuba the detection of huanglongbing led to the production of budwood in protected nurseries, eradication of infected plants and affected orchards, and chemical control of the psyllid vector (Llanes-Alvarez et al. 2021). The authors conducted a study to investigate the impact of these management changes on the incidence of CTV-infection and changes in the virus population. Although only a small number of isolates was obtained (27), the results showed a decrease in CTV incidence and a wider spread of mild CTV strains, which according to the authors, could be partially explained by the changed management practices.

*Erwinia amylovora*

*Erwinia amylovora* is a gram-negative bacterium and the causal agent of the economically damaging disease fire blight in apples and pears, and other members of the family *Rosaceae*.

Core articles – Electronic Supporting Information, S1:

Fire blight was first reported in Kyrgyzstan in 2008 and has reached the unique wild walnut-fruit forests in South Kyrgyzstan, a site of internationally important global biodiversity and genetic resources forspecies of *Juglans*, *Malus*, *Prunus*, *Acer*, *Pyrus* and *Crataegus*. Surveys were made for fire blight during 2018-2019 in private gardens, orchards, and wild trees across the forest, at a total of 29 sites with about 150 samples taken from representative plants of these species (Doolotkeldieva et al. 2021). GPS coordinates of sampled sites, positive and negative samples by plant species, and *E. amylovora* genotypes, were combined with the occurrence locations of endangered species of *Malus* and *Pyrus*. Fire blight was found in 12 of the sites in or close to the forest, but mostly on domesticated varieties. No infection was found on the endangered species but their proximity to infected sites raises concern and calls for preventative measures to be put in place. The genotypic analyses of previously collected isolates from North Kyrgyzstan indicated that natural disease spread had occurred.

For other studies such as the recent emergence of fire blight in East Asia, the use of genomic studies has been essential both to characterise *E. amylovora* strains and to infer their origin and potential introduction pathways (Song et al. 2021). In the case of the emergence in Korea, genomic analysis of isolated strains indicated an ancestral lineage with North American strains.

A fire blight outbreak caused an unprecedented loss of pear trees in Tunisia in 2013. Five years of field surveys were made from 2015 – 2019 in parts of the country comprising 95% of the pear growing areas (Trad and Taoueb 2021). The purpose of the surveys was to inventory the impact on pear genetic resources in the country. The area of pear production harvested had declined from 8500 ha prior to the outbreak to 3000 ha in 2018, with the tonnage harvested reducing from more than 60000 tons to less than 13000 over the same period. Of 16 cultivars inventoried, 10 were of European origin, all of which were sensitive to fire blight. The six local cultivars which tended to shorter blooming periods, although sensitive, were more resilient to the disease and ex-situ conservation of these genetic resources was recommended as a means of sustaining future production.

*Erwinia amylovora* also infects other members of the Rosaceae. A natural outbreak of bacterial blight of strawberry in Turkey caused by *E. amylovora* was recorded following surveys made in 2018 and 2019 (Ozturk and Soylu 2021). Some 38 diseased plant samples taken from 22 fields in 14 production areas in two provinces. Isolations were confirmed as *E. amylovora* rather than other known *Erwinia* species, confirming the record as a new disease in Turkey. Previously its occurrence on strawberry had only been reported in Bulgaria. The significance of the finding for strawberry growers lies in the transmission of the bacterium by bees and the need for control measures where there is proximity to pome fruit and other susceptible ornamental plant species.

Supplementary articles:

A naturally occurring fire blight epidemic occurred in 2020 in the USDA *Malus* germplasm collection held at Geneva, New York State in the USA (Dougherty et al., 2021). Some 1142 trees of 41 *Malus* species were assessed for shoot severity (no. infected shoots/total no. shoots) with 2525 trees of 48 species also assessed for cut severity (amount of tree removed with fire blight). A subset of 667 trees was assessed for disease progression in June and July, with on average shoot severity increasing by about 12% from June to July, although there was considerable variation across *Malus* spp. representing the range in fire blight resistance and susceptibility in the collection.

Two lateral-flow diagnostic kits were compared with DNA-based methods and tested for their in-field use in fire blight diagnosis (Singh et al., 2021). Unusually for such studies, grower surveys and cost-benefit analyses were done, indicting the suitability of immunoassay test kits for their use in fire blight management.

Biological control of the fire blight pathogen has been proposed as an environmentally benign alternative to antibiotics such as streptomycin, now banned in Switzerland (Gschwend et al., 2021), with the increased availability of DNA sequencing in plant microbiome studies opening-up new areas of research. Blossom samples were taken in a low-input apple orchard and subjected to standard DNA-based methods to estimate microbial diversity. It was concluded that an abundance of natural fungal and bacterial antagonists counteracted the establishment of *E. amylovora* in the low-input orchard. However, no direct comparison with fire blight incidence on individual trees was made in this study.

*Fusarium* spp. complexes

The genus Fusarium is a ubiquitous group of fungi, some species of which are pathogenic on plants and can be airborne as well as soilborne. They are often found in species complexes with some cryptic species. The presence of disease-causing complexes makes risk assessment, epidemiology, and disease management difficult.

Core articles – Electronic Supporting Information, S1:

Pokkah boeng disease of sugar cane is caused by a *Fusarium* species complex, including *Fusarium verticillioides* and to a lesser extent *F. proliferatum*. Epidemics occur following outbreaks of the disease in large areas of susceptible crops. Sugarcane varieties bred in China for pokkah boeng disease resistance were screened in regional field experiments in areas where incidence of the disease has been high (Shan et al. 2021). A total of 60 new elite varieties and 31 established varieties were tested in the study. A greater proportion of the new elite varieties were moderately-resistant to resistant (59%) compared with the established varieties (41%). The results suggested that in areas conducive to the disease, new elite varieties should replace established varieties to obtain an appropriate distribution of varieties, control outbreaks of the disease, and improve the development of the sugarcane industry in China.

The Fusarium wilt and root rot complex is a major constraint to chickpea cultivation in Ethiopia. In 2015 and 2016, GPS-referenced field surveys were done covering 51 districts representing 17 chickpea growing areas (Bekele et al. 2021). Fields were selected at 5-10 km intervals and quadrat samples were taken using a diagonal transect design with 23-32 plants per quadrat, depending on plant density. Across all sites *Fusarium oxysporum* f.sp. *ciceri* was the predominant species (almost 70% of total isolates) but with *F. solani*, *Rhizoctonia bataticola*, *R. solani*, *Sclerotium rolfsii*, and other unidentified fungi represented among the isolates. The incidence of the disease was significantly associated with clay soils, with the highest incidence of about 45% found in the Amhara region where heavy clay soils (vertisols) predominate.

In Pakistan, tomato wilt is one of several diseases of tomato that reduce crop yield on an annual basis. The disease is associated with a complex of soil-borne pathogens including *F. solani*, *F. oxysporum*, and Verticillium spp. A survey was made in five districts of Punjab province over two consecutive years (Nawaz et al., 2021). Five locations were selected in each area with five sites at each location. Samples were taken at the nursey, flowering and fruit stages, disease was assessed, and isolations made. Across all sites, *F. oxysporum* was found with severe attacks at the flowering stage – subsequently confirmed as f.sp. l*ycopersici*. As well as *Fusarium* wilt, *Verticillium dahlia*, *Alternia solani*, *Pythium* spp., parasitic nematodes, and tobacco mosaic virus were found at different growth stages indicating the difficulties in tomato cultivation in Punjab province.

Supplementary articles:

In Sri Lanka, pokkah boeng disease has recently emerged since 2019. Leaf samples were taken from three diseased plants showing typical symptoms in each of two farms, followed by pathogen isolation and pathogenicity testing, morphological and DNA sequencing, and phylogenetic tree construction (Srimali et al. 2021). Two isolates were confirmed as *F. proliferatum* and *F. incarnatum,* which when inoculated onto healthy plants appeared to induce different phases of symptom development.

In sugar cane co-infections of *Colletotrichum falcatum* (a member of the *C. gramimicola* complex causing red rot disease symptoms) and *Fusarium* spp. can occur. Twenty-two samples of stalks and leaves from plants with red rot symptoms were collected (two stalks per sample) from five locations in Minas Gerais and Paraná, Brazil, to understand better the aetiology of the disease (Costa et al. 2021). A total of 30 isolates were obtained and identified within the genera *Colletotrichum* (two species) and *Fusarium* (three species belong to the *F. fujikuri* complex). The Fusarium species also induced symptoms of pokkah boeng disease.

The joint effect and compatibility of phosphite and *Trichoderma* in controlling the Fusarium spp. involved in pokkah boeng disease was tested in planta (in the greenhouse not in the field) (Solic-Palacios et al. 2021). The *Fusarium* spp. complex used in the study had been isolated from the rhizosphere of cultivar with pokkah boeng symptoms in a sugar cane plantation in Mexico. In each of 80 pots a single sugarcane cutting bud was planted with phosphite (six levels) and *Trichoderma* (two isolates) and *Fusarium* treatments were applied in a full factorial design. The best treatment was found to be a combination of an intermediate level of phosphite and one of the *Trichoderma* isolates, improving plant height, culm length, and leaf dry weight. It was concluded that phosphite and Trichoderma could act synergistically in reducing infection while at the same time stimulating plant growth.

*Fusarium oxysporum* f.sp *cubense* (*: see also results of Objective 2)

*Fusarium oxysporum* f.sp *cubense* is a fungal plant pathogen that causes Panama disease of *Musa* spp., also known as fusarium wilt of banana. Tropical race 4 has been of particular concern on commercial banana cultivars, and the species designation *F. odoratissimum* has been proposed, but not fully accepted.

Core article – Electronic Supporting Information, S1:

The spatial and temporal dynamics of Fusarium wilt of banana caused by *Fusarium oxysporum* f.sp *cubense* (*Foc*) was assessed in surveys of 30 banana fields ranging in size from 0.85-6.67 ha covering 95 ha across different states of Brazil, and including three commercial banana subgroups (Silk, Pome, Cavendish) (Heck et al. 2021). Disease incidence, spatial aggregation and yield in the surveyed fields were assessed. For every 1% increase in disease incidence there was an increase in the estimated economic loss of about US$ 110 ha-1 year-1. Evidence was found for the secondary spread of disease to neighbouring and distant plants. The key to managing the disease is to understand how the pathogen arrives in the field and the mechanisms of dispersal.

Supplementary articles:

A major concern in banana production is the differential pathogenicity of races of *Foc* on banana cultivars/types and the implications for future development and deployment of resistance; in particular, the tropical and sub-tropical forms of Race 4 affecting the Cavendish Group. Surveys in India have shown the presence of Race 1 and both forms of Race 4, with typical incidences of up to 45% from Foc leading to the abandonment of banana production in some areas. A total of 61 Foc isolates were collected from widely separated banana-producing States in India, race-typed and virulence tested, and subjected to genome analysis (Thangavelu et al., 2021). Molecular markers were developed that differentiated between all three races present in India that could be used for both quarantine and disease management purposes.

Understanding the dispersal of *Foc* is key to the development of control strategies, both the initial introduction with planting material, and the subsequent spread in farmers’ fields, with the latter aspect being particularly poorly understood. A range of mechanisms has been proposed for within field spread, including the possibility of insect root feeding and subsequent movement of soil-borne pathogens. The banana weevil *Cosmopolites sorditus* is a major pest in banana cultivation with larvae feeding mainly on the rhizome of banana plants. Laboratory experiments were done in which inoculum of *Foc* was acquired externally or internally in the digestive tracts of the weevil from Gros Michel bananas (Sánchez et al. 2021). Although viable external and internal inoculum (through faeces) declined, weevils remained infective for 2-3 days, considered sufficient for dispersal. Pathogenicity of isolates was confirmed on Gros Michel, i.e., race 1 of *Foc*, not the destructive race 4 on Cavendish bananas.

Soil properties, nutrition, and production system affect disease progression within fields as well as cultivar resistance. A comparison was made of chemical-physical plant nutritional status effects in *Foc* infected and healthy plots in two banana production systems and climates in Brazil (Teixeira et al., 2021): five farms in a lowland tropical monsoon area (average area 10-20 ha, altitude ≤ 150 masl, intensive inputs), and four farms in a dry winter subtropical highland area (average area < 5 ha, altitude ≥ 900 masl, low inputs). In the intensive input lowland area, *Foc* was associated with higher soil acidity and lower levels of P, Ca, and Mn but showed no association with physical attributes. In the low-input highland area, soil chemical/physical attributes were not associated with wilt incidence, except that boron was lower in *Foc*-infested plots and bulk density and penetration resistance were higher. Wilt also affects the plants’ nutritional status with Ca, K and their N ratios lower in *Foc*-infected plants. Although soil management practices are shown to have an impact on *Foc*, the question arises as to whether these are relevant for banana production in sub-optimal areas.

The destructive nature of *Foc* Race 4 means that novel methods of disease control are urgently needed. The use of endophytic bacteria has been proposed as one such measure (Tian et al. 2021). A strain of *Bacillus amyloliquefasciens* isolated from banana roots was found to be antagonistic to Race 4 and a full genomic and transcriptomic analysis was made, which showed an enhanced production of anti-fungal metabolites contributing to the inhibition observed.

*Magnaporthe oryzae*

*Magnaporthe oryzae* is a member of the *Magnaporthe grisea* species complex and causes rice blast, a serious disease of rice. The pathogen can also affect other members of the *Poaceae*, including wheat, rye, barley, and pearl millet.

Core article – Electronic Supporting Information, S1:

Rice cultivation in Italy is seriously affected by rice blast with most cultivars grown either moderately or highly susceptible to the disease, leading to a high reliance on fungicides. A process-based simulation model was developed to forecast the incidence and severity of leaf and panicle blast in northern Italy and future trends under climate change scenarios (Wang et al., 2021b). The data set for initial model testing was a 3-year experimental trial (2013-2015) at three locations where leaf and panicle blast were assessed on four rice cultivars of differing susceptibilities, agrometeorological records of temperature, relative humidity, and rainfall at these sites, and historical records of the disease in different municipalities. Spatial simulations based on a 2 km x 2 km resolution were run for time horizons up to 2030 or 2070. The climate change scenarios considered predicted little change in current levels of the disease by 2030, with a slight decline by 2070. The key factor in modulating trend in disease was the level of cultivar resistance, which highlighted the need for continuing investment in breeding for improved resistance.

Supplementary articles:

Multiple constraints affect rice yields in West Africa. Rice blast can cause losses estimated at about 4% in sub-Saharan Africa. Pairs of sites in three geographical zones of Burkina Faso, each with an irrigated area and a rainfed area, were surveyed over four consecutive years 2016-2019 (Barro et al. 2022). Within the six sites, fields were selected, based on aerial photographs, that were accessible and evenly distributed spatially within site. Fields were about 625 m2 in area and numbered between 5 and 11 at each site per year. A total of 2864 plants in 179 fields were observed over the four years, with corresponding farmer interviews held at 81% of the surveyed fields. Four main diseases were found: rice yellow mottle disease, bacterial leaf blight, blast, and brown spot. The average incidence of blast across the whole data set was just under 10%, considerably less than the 30% for brown spot (*Bipolaris* spp). Blast symptoms were more common in irrigated areas, but there was no interaction with geographical zone. Co-occurrence of blast with other diseases ranged from about 10 to 40% across the whole data set with a higher frequency in irrigated areas. The highest level of co-infected plants found, considering only two of the main pathogens including *Magnaporthe oryzae*, was 20% of sampled plants at one field in an irrigated area.

Rice blast occurs on commercial rice in northern Australia and is also found on wild rice (*Oryzae australiensis*). An investigation of the host range of *Magnaporthe oryzae* in Australia was made on commercial and wild rice, and a range of other *Poaceae* hosts both cultivated and wild, using four isolates from commercial rice (Pak et al., 2021). Inoculations, plant growth and disease assessments were made under glasshouse and controlled environment conditions. Pathogenicity on the *Poaceae* species was made by extracting fungal DNA from infected plants to confirm fungal identity. There was variation in pathogenicity across the four isolates, however pathogenicity was confirmed across all *Poaceae* hosts under these conditions indicating that they could serve as reservoirs of *M. oryzae* strains and spread these to commercial rice, and potentially enable the development of more host-specific strains of the pathogen.

The *Triticum* pathotype of *Magnaporthe oryzae* causes wheat blast and is endemic in some South American countries (Mills et al., 2021). The first report and epidemic of wheat blast in Bangladesh in 2016 represents a food security risk to South Asia (He et al. 2021). The evolutionary history of *M. oryzae* from the grass genus *Setaria* to rice and from *Lolium* spp to wheat, and the recent emergence of blast on maize in Iran since 2012, with a suggested host jump from *Echinochloa* spp to maize (Pordel et al. 2021), demonstrates the potential for range expansion of this pathogen.

Maize lethal necrosis

Maize lethal necrosis is a disease of maize caused by coinfection with maize chlorotic mottle virus (MCMV) and one of several potyviruses, including sugarcane mosaic virus (SCMV).

Core article – Electronic Supporting Information, S1:

Maize lethal necrosis disease (MLN) first appeared in Kenya in 2011 (de Groote et al. 2021). The first survey of 121 communities in 2013 using a hierarchical two-stage approach across the agroecological zones for maize cultivation estimated the proportion of households affected at 76% and a yield loss estimated overall at 22%, but in western Kenya (highland tropical and moist transitional zones) at 94%. In the second survey in 2018, the same communities were revisited, repeating the same questions. The results showed that the overall proportion of households affected by MLN had declined to 26%, but remained high in western Kenya at 60%, with an annual loss of 8.5%, but with western Kenya again disproportionately affected (yield loss of 79%). The reasons for these declines were unclear but may have involved the use of insecticides to control the fall armyworm *Spodoptera frugiperda*, disease-free seed, and unfavourable weather, but not the use of resistant varieties or adoption of new management practices.

Supplementary articles:

Multispectral high-resolution techniques combined with field-based data have been evaluated in a semi-humid climatic zone of Kenya to estimate MLN severity and to map this onto three severity levels (mild, moderate, high) (Richard et al., 2021). However, the results suggested spectral confusion in the mildly and moderately affected fields due to the onset of early MLN symptoms, rather than other biotic or abiotic stressors.

The seed production system for maize was assessed for the status of MLN with both small- and large-scale seed producers in Kenya (Eunice et al. 2021). A survey was made over four years (2015, and 2017-2019) in five agroecological zones based on rainfall and altitude. Surveyed fields in the seed production areas were selected at 10-20 km intervals for assessment of MLN incidence and severity, noting the variety, growth stage, and environmental conditions. Overall, some 2550 ha were surveyed. Immuno-strip kits were used for in-field detection of MCMV, and leaf samples were taken for qRT-PCR analysis. The results showed an overall incidence of MLN at 21% with no significant differences among varieties, agroecological zones, or growth stages, although elevated levels were found in sub-humid counties known to be crop production hotspots for MLN. Of the leaf samples analysed by qRT-PCR analysis, 38% had MCMV alone, 14% SCMV alone, and 18% with both MCMV and SCMV. The results highlighted the need for phytosanitary inspections to be included in seed legislation as a legal requirement.

A field survey was made in Ethiopia where MLN had been reported to determine whether infection by MCMV was present in alternate hosts (Regassa et al., 2021). Field assessments were made in two contrasting regions of Ethiopia during the cropping systems of 2016 and 2017. Maize fields were quadrat sampled alongside accessible roads at 5-10 km intervals with the number of leaf samples collected varying with the level of MLN assessed. A range of weed species with and without virus-like symptoms were assessed with herbarium specimens taken for species identification where possible. A total of 434 samples belonging to 28 species and 11 families were collected, with 113 displaying virus-like symptoms. DAS-ELISA was used to detect MCMC and SCMV and back-inoculations were made onto healthy susceptible maize plants using sap preparations from positive-tested leaves. MCMV was detected in 23 and SCMV in 4 of 113 symptomatic plants collected from the maize fields, with 11 being coinfected. The *Poaceae* family had the highest number of grass species with natural infection of MCMV with *Cyperus rotundus*, sugarcane and sorghum having coinfections of MCMV and SCMV.

The spread of MLN in East Africa presents a potential threat to maize production in all south African countries as it has already reached Tanzania. In 2019, a survey was made in South Africa along the main grain transport route from Gauteng province in the high veldt to KwaZulu-Natal, adjoining Mozambique, one of the regions considered most at risk (Nel et al. 2021). Commercial and smallholder farms were surveyed along the roadside at approximately 20 km intervals. Sites with only volunteer maize were sampled at distances no less than 5 km apart. Maize leaves with virus-like symptoms were collected with a maximum of 20 leaves per site depending on the incidence of symptoms. Nucleic acid extraction, sequencing, and phylogenetic analyses were made with the leaf samples. Although some maize viruses and variants were new reports for South Africa, no MCMV or potyviruses were found in the leaf samples.

*Meloidogyne* spp.

Root knot nematodes are plant parasitic nematodes of the genus *Meloidogyne*. The genus contains more than 90 species with infection in about 2000 host plants.

Core article – Electronic Supporting Information, S1:

The root knot nematodes *M. incognita* and *M. hapla* often occur together with other soilborne fungal pathogens in a disease complex. In a survey of 71 protected (high tunnel) tomato production sites in Ohio, USA, soil samples were collected and used for diagnostic bioassay with potted plants and for DNA extraction and PCR assay (Teston et al. 2021). *Meloidogyne* spp., mostly *M. hapla,* were found in 32 of the high tunnels although there was some inconsistency between the diagnostic and PCR assays. Co-infestation or co-infections with other soilborne fungi were common.

Supplementary articles:

Soil samples were taken from ware potato production areas in eight provinces of Turkey in 2018/19 (Evlice 2021), representing some 58% of the potato production and harvested area. A total of 927 soil samples (ranging from 69-226 per site) of 2-3 kg were collected from sites. Root knot nematodes were extracted into suspension and counted, nematode DNA was extracted and amplified with multiplex PCR using primers for six *Meloidogyne* spp. A root knot nematode community analysis was then done for the absolute and relative frequency of each species. Of the 927 soil samples, *Meloidogyne* spp. populations were detected in 84. Most were determined to be *M. chitwoodi* (70), with some *M. hapla* either in single (3) or mixed populations (11) with *M. chitwoodi*.

Cotton is an important cash crop in Pakistan. In Punjab province cotton is reported to be heavily affected by wilt disease. A survey was made of 15 locations in cotton growing areas across Punjab to determine wilt prevalence (% fields with wilt) and incidence (% plants with wilt), and the associated pathogens and presence of root knot nematodes (Naz et al. 2021). Isolation and identification of fungi and of root knot nematodes was made from diseased roots. The maximum prevalence across the locations surveyed was 85% with a maximum incidence of 15%. The highest frequency of fungi associated with root samples was found to be *Fusarium oxysporum* and, to a lesser extent, *Rhizoctonia* and *Pythium* spp. The dominant root knot nematode found was *M.incognita*. A similar survey was made in Kyber Paktunkhwa province of Pakistan as part of a study on soybean resistance to *M. incognita* (Ramzan et al. 2021).Soil and root samples were taken from 29 soybean fields (2-28 samples per field), giving a total of 453 samples. Root knot nematodes were isolated, cultured and identified. More than half (246) of the fields were infested with either *M. incognita* (86%) or *M. javanica* (16%), the most prevalent being *M. incognita*.

*Meloidogyne* spp. were found to be the most important plant parasitic nematodes in vegetable fields in Georgia, USA (Marquez et al., 2021). During the spring and fall cropping periods in 2018, some 436 fields across 29 counties were surveyed and sampled for the incidence and abundance of 10 plant parasitic nematode genera in 32 different vegetable crops. The overall incidence of *M. incognita* was about 67%, with a maximum abundance of over 14 000 nematodes per cm3 soil. Cropping system was found to be more important than environment for plant parasitic nematodes. In Algeria a wide range of endemic nematophagous fungi belonging to eight genera was found in vegetable fields in Algeria and found to have the potential to suppress *M. incognita* and M. *javanica* populations by 70 and 50% respectively (Sabri et al. 2021).

Reports on the occurrence of *Meloidogyne* spp. with other nematode species on specific crops were common but are not commented on further.

*Pseudomomas syringae* pathovars

An overview on the species is given in Straub et al. (2021). Disease symptoms occur on leaves, blossoms, fruits, and woody tissues across a wide range of hosts. More than 50 pathovars have been designated based mainly on the host species. However, pathovar *syringa* can be present with other pathovars on some hosts.

Core article – Electronic Supporting Information, S1: Kant et al. (2021).

Bacterial blight of pea is associated with two pathovars of *Pseudomonas syringae*: *Ps. syringae* pv. *syringae* (Pss), and *Ps. syringae* pv. *pisi* (Psp). Both pathovars cause indistinguishable symptoms on field pea and require laboratory testing to determine the causal pathovar. In recent years, the more heterogeneous Pss has become the dominant pathovar in Australia causing severe outbreaks and annual surveys are made to determine changes in the causal pathovar. To aid rapid screening techniques that potentially could be used in field surveys, Kant et al. (2021) have developed an accurate and robust LAMP assay for the detection and differentiation of the two pathovars.

Supplementary articles:

Branches of sweet cherry cultivars with active and inactive cankers were collected monthly from four locations in Serbia, where the presence of *Ps. syringae* pv. *syringae* and pv. *morsprunorum* had previously been confirmed, to determine the persistence of bacteria in the cankers (Iličić et al. 2021). At the exact locations, isolations were made during February, March and October from healthy leaves and buds to ascertain whether epiphytic populations of Pss and Psm were present. The branch samples showed that both pathovars persisted in cankers in low numbers over the summer and became active in the autumn. Significant epiphytic populations of both pathovars were present in the spring, decreased in the summer and then increased in the autumn. These findings of seasonal activity provide insight into the transition from the epiphytic to parasitic life stages and disease epidemiology but provide qualitative rather than quantitative information.

*Pseudomonas syringae* pv. *actinidiae* (Psa) has severely affected kiwi fruit production in many producing countries. Most *Actinidiae* spp are dioecious, with male and female plants responding to pathogens in distinct ways in terms of disease susceptibility and phenological development. Male plants are included in orchards predominantly for pollination. Psa causes bacterial canker, but other Ps. syringae pathovars, including pv. *syringae* cause blossom blight in kiwi. Small numbers of male and female plants (five each) were selected from a 1-ha orchard where Psa had been detected and from a 0.5 ha orchard with no Psa detected (Ares et al. 2021). 10 leaves were taken from each selected plant with the sampling procedure done twice on the same plants in June and October. The diversity of the associated bacterial communities was assessed by DNA extraction, amplification of the 16S ribosomal gene, and Illumina sequencing. The leaves of healthy male and female plants shared most of the same bacterial populations, but with some genera increasing from June to October. There were major changes in the bacterial community on Psa-infected female plants with reductions in the relative abundance of genera predominant on healthy plants, less so on male plants. Some of the identified genera have the potential to act as antagonists of Psa.

A significant number of populations within Psa within at least five biovars have been described. Biovar 2 has been found only in Korea, where streptomycin has been used as a control method for 20 years or more, where in 1998 no streptomycin resistance had been found. Four streptomycin-resistant strains were isolated in 2013 and 2014 from symptomatic kiwi plants in different orchards located in Jeju, Korea (little information given), and were examined for genes often found in streptomycin-resistant bacteria (Lee et al. 2021). All four strains of Psa were found to have the stsA/strB gene as a resistance determinant. Further work is required to assess resistance in the soil, rhizophere and phyllosphere microbiome and the possibility of horizontal gene transfer between Psa and other streptomycin-resistant bacteria. Little mention is made of the status of Psa in Korea.

*Puccinia striiformis* f.sp *tritici*

*Puccinia striiformis* f.sp *tritici* is one of three major rust pathogens of wheat, causing yellow or stripe rust disease. Emergence of new pathotypes and virulence patterns continues to cause concern.

Core article – Electronic Supporting Information, S1:

Spatiotemporal changes in varietal resistance of wheat to yellow rust were studied over the period 1985-2018 in 54 French departments (Perronne et al. 2021). Field adult plant resistance levels, race-specific resistance genes, pathogen pathotypes and virulence profiles, and wheat acreages were recorded in annual surveys made at the district level. Over this period, an increase in varietal resistance was found due to a combination of quantitative resistance and accumulation of different race-specific resistance genes. The main conclusion made was that replacement of “newly susceptible” varieties by “still resistant” ones before each seasonal epidemic has had a substantial effect on the increase in overall resistance over these decades.

Surveys of wheat yellow rust in five Egyptian provinces over the period 2018-2020 revealed 42 physiological races, with six new aggressive races detected in the study (Esmail et al. 2021). Field response data indicated that of 15 wheat cultivars tested, only four showed moderate levels of resistance with known resistance genes. Combinations of such genes, both durable and broad-spectrum, would be the best option to avoid large scale rust epidemics in Egypt. A pre-requisite in phenotyping rust resistance in breeding programmes, it is essential to have a reliable disease assessment scale for scoring responses to infection to avoid misclassification in resistance gene characterisation. A high-resolution pictorial scale has been developed for wheat adult plant growth stages (Sandhu et al., 2021) that would prove useful in phenotyping of breeding lines but also in scoring rust symptoms in wider field surveys.

Supplementary articles:

*P. striiformis* f.sp *tritici* is a heteroecious macrocyclic rust which forms its sexual stage on barberry (*Berberris* spp.) although in many countries which experience wheat yellow rust, it is unclear what role barberry plays in the epidemiology of the disease. Studies made in China (Chen et al., 2021), where yellow rust was first reported in 2010, investigated the role of the sexual stage in providing an inoculum source for infecting wheat. Leaf samples bearing aecia were taken from naturally infected barberry in two counties of Qinghai province in June, with leaf samples with uredinia taken from wheat at least 100 m distant from the barberry one week after the appearance of aecia on barberry. A total of 375 aecia were taken from 52 barberry bushes at 11 sites in the two counties. Inoculations of wheat differentials with the two inoculum sources were made. Phenotypic and genotypic analysis showed a common ancestry between isolates taken from barberry and wheat and indicated that aeciospores play an important role in the spread of disease from barberry to wheat.

In China, clonal populations can persist where different regions have conditions suitable for over-wintering and over-summering, with migration pathways providing inoculum for spring epidemics. Some 567 isolates of Pst were taken from over-summering (Gansu-Niangxia) and over-wintering (north-western Hubei) regions from autumn 2016 to spring 2018 (Wang et al. 2021) and genotyped using SSR markers. A greater diversification was found in the spring compared with the autumn population, with only 17 common genotypes found across the 208 determined. Although the amount of inoculum overwintering may determine the risk of interregional epidemics there was no evidence for extensive genotypic exchange between over-summering and over-wintering regions.

India has had a long history of outbreaks of yellow rust with severe epidemics occurring frequently. The *P. striiformis* f. sp *tritici* population in India, as in many other wheat growing countries and regions, is clonal with dominant lineages emerging through mutations. A total of 951 yellow rust samples were taken from farmers’ fields and trap plot nurseries 31 districts across five States and one Union territory (Jammu and Kashmir) in northwest India between 2015 and 2019 and analysed for virulence (Gangwar et al., 2021). The prevalence of the dominant lineage has declined over the sampling period from 62% to just under 50%. The most virulent lineage was present at 6.8% with most of the other characterised lineages present at less than 5%. Such information should prove invaluable for the deployment of resistant cultivars where these are available.

Annual surveys of winter wheat disease in the UK have been made since 1970. Samples from between 250 and 350 randomly selected wheat crops in England and Wales were taken between 1999 and 2019 and assessed for visual symptoms of a range of diseases at a given growth stage (Turner et al. 2021). The incidence of yellow rust remained at trace levels throughout this 20-year period and exceeded 5% of crops affected in only four years, with disease severity exceeding 0.02% leaf area affected in only one year. This is an extremely low prevalence given a high diversity in the rust population, attributed to cultivar use diversification and high uptake of resistant cultivars with no associated breakdown in resistance, and no reduction in efficacy due to the development of fungicide resistance.

*Xylella fastidiosa* and vectors

*Xylella fastidiosa* is a xylem-limited bacterium with a wide host range, currently about 600 plant species, including grapevine, citrus, stone fruit, coffee, olive, and oleander. At least four subspecies have been designated with some partial host affiliations. The bacterium is transmitted by several xylem-feeding leafhoppers, in Europe mainly by the meadow spittlebug *Philaenus spumarius*, for which there has been a major range expansion in the last decade.

Core articles – Electronic Supporting Information, S1:

Plant health legislation in the European Union requires the implementation of annual surveys for priority quarantine pests, and consequentially to delimit the infested zone of the bacterium *Xylella fastidiosa* where an outbreak has been reported. Official surveys under this legislation have been in place in Alicante, Spain, since 2017 when the first outbreak of *X. fastidiosa* subsp. *Multiplex* occurred on almond. In 2019, the demarcated area in Alicante covered 140000 ha with almost 5000 orchards, and some 75000 trees destroyed. A strategy to optimise the official survey programmes was proposed by Lazaro et al. (2021). Using the official survey data, a sequential adaptive delimiting scheme based on increasing spatial resolution was developed and optimised using simulation methods. The proposed survey scheme would be adaptive, enabling the inspection and sampling intensities to be modified according to previous information based on coarser spatial resolutions, and would improve the efficiency of the official survey methods.

The meadow spittlebug *Philaenus spumarius* is a vector of *Xylella fastidiosa*. Adult population abundance was assessed in north coast vineyards of California from 2016-2018 using sweep and trap surveys to determine the contribution to epidemics of Pierce’s disease of grapevine (Beal et al., 2021). Spittlebug adults were present from April to December but there were significant differences in transmission rates from July to December, with the greatest risk of transmission being in December. This period of infective spittlebugs does not align with historical patterns of epidemic development arising from the spring flights of infective *Graphocephala atropunctata*, a vector considered critical in initiating epidemic development of Pierce’s disease in the region. *P. spumarious* may play a secondary role in plant-to-plant spread of the bacterium.

Spittlebug species are the only known vectors of *X. fastidiosa* in Europe. Spittlebug diversity, phenology and host-plant association were assessed over three years in vineyards of northwest Italy (Bodino et al. 2021). These included a 2-year survey of a single site in the province of Asti in Piedmont in 2016-2017, and a further 1-year survey in Asti and two other sites in Piedmont in 2018. *Philaenus spumarius* was the most common species and reached high population levels in vineyards where there was herbaceous coverage for the whole season and only moderate use of insecticides. The extended presence of the vector on grapevine represents a significant risk factor for the spread of *X. fastidiosa* in northwest Italy and elsewhere in Europe. The main vector of *X. fastidiosa* in Europe is the spittlebug *Philaenus spumarius*, although other xylem-sap feeding insects have been investigated for their ability to vector the bacterium. In Italy, the main outbreak area has been in Apulia with subsp. *pauca* causing olive quick decline syndrome. Following the detection of subsp. multiplex in *Spartium junceum* in Tuscany in 2018, attempts were made to identify putative vectors by identifying the bacterium in insects that had tested positive (Gargani et al., 2021). Insect collection sites had been established as part of a 5-year survey in Tuscany from 2015 to 2019 with the number of sites ranging from 179 to 263 across these years. Over this period, more than 4000 specimens from the suborder Auchenorrhyncha were collected with no positive insects found. In 2019, subsp. *multiplex* was found in small numbers (<10) of *P. spumarius* and *Neophilaenus campestris* specimens.

The Balearic Islands of Spain hold the greatest diversity of *X. fastidiosa* in Europe with subspp. *fastidiosa*, *multiplex*, and *pauca* found infecting a range of host species including the economically important almond, olive, grapevine, and fig (Olmo et al. 2021). Between November 2016 and December 2020, over 13000 plant samples were analysed by the Official Laboratory of the Plant Health Service of the Balearic Islands based on mandatory monitoring with random sampling required by the European Commission (symptomatic and asymptomatic samples), and results from research projects and samples from farmers and other organisations (only symptomatic samples). Samples were taken from 453 plant taxa representative of crop fields, gardens, and wild communities, weighted according to the land area of the four islands. About 9% of plant samples tested positive for the bacterium with olive, grapevine and almost accounting for more than 60% of the positives (recognising the bias implicit in sampling from these economically significant crops). Olmo et al. (2021) concluded that the eradication and contingency strategies imposed were inadequate largely because the epidemiological history of the epidemics had not been investigated.

*Verticillium dahliae* is a xylem-limited fungal pathogen that can cause symptoms that can be confounded with water stress and similarly with symtoms arising from *X. fastidiosa* infection. Large scale detection methods using remote hyperspectral and thermal imagery have been used successfully to detect the presence of both pathogens separately, and recently methods have been developed to discriminate infections when both pathogens are present (Poblete et al. 2021). Data sets from 27 olive orchards in Italy and Spain where there had been outbreaks of *V. dahliae* and latterly *X. fastidiosa* over the period 2011 to 2017 were used to develop an algorithm to discriminate the symptoms. The method generated false positive rates of 9% for *V. dahliae* and 4% for *X. fastidiosa*. This type of study was repeated by the same group with over one million trees to disentangle biotically induced symptoms from those caused by abiotic stress (Zarco-Tejada et al. 2021). The results indicated that the uncertainty associated with *X. fastidiosa* detection, estimated from probability distributions was reduced to less than 6% across a range of hosts.

Supplementary articles:

The occurrence and distribution of vectors was assessed at 19 sampling areas in Calabria, neighbouring the main outbreak area of subsp. *pauca* in olive in Apulia, from August to October 2020 (Lombardo et al. 2021). All 563 individual specimens tested negative for the bacterium.

To date, severe disease outbreaks caused by *X. fastidiosa* in Europe have occurred only in regions predicted using species distribution models to be highly favourable for the vector *Philaenus spumarius* supporting the view that the climatic response of the insect could play a major role in the spread and distribution of the pathogen in vulnerable hosts (Godefroide et al. 2022). The same models also predict that over the period 2040-2060 there may be a decrease in climatic favourability for the vector.

The spread of *X. fastidiosa* around the Mediterranean basin has led to an increased awareness of many neighbouring countries not only of the need to make regular surveys of vulnerable crops but also to assess the economic costs of invasion. Lebanon is the country considered to be at the highest risk in the Middle East and North African region (Frem et al. 2021). Grapevine is an important crop in Lebanon with an average 5-year annual revenue of US$ 22 million. An economic analysis estimated the potential economic losses could be US$ 11 million over four years with replacement of plants to over US$ 84 million over the normal life span of grapevine in which infected plants are not replaced. As well as the private losses to grapevine holdings there would be public costs involved in plant health regulation and risk management of the disease.

*Zymoseptoria tritici*

*Zymoseptoria tritici* is the causal agent of Septoria tritici blotch and one of the most serious diseases of wheat, particularly of winter wheat in western Europe. The disease is particularly difficult to control due to the widespread occurrence of resistance to multiple fungicides, and only partial resistance to the local pathogen population being available in cultivars.

Core article – Electronic Supporting Information, S1:

Fungicide resistance in *Zymoseptoria tritici* causing Septoria tritici blotch of wheat was monitored annually from 2004 to 2017 at about 70 sites in 22 regions of France representing about 25000 km2, with an average of 4-5 trials/region (Garnault et al., 2021). Changes in resistance frequency were modelled in relation to regional use of fungicides, yield losses, and the area of organically grown wheat. The regional scale was the most appropriate in identifying fungicide use intensity as the main determinant of the dynamics and evolution of resistance. The predictions of the model replicated the spatial and temporal patterns of fungicide resistance in field crops with a high level of confidence. The main conclusion drawn was that fungicide resistance would best be managed at the regional level to complement local action.

Supplementary articles:

In the UK, Septoria tritici blotch kas been the most prevalent and severe disease of wheat found in annual surveys of wheat disease since 1999 (Turner et al. 2021). Although there has been no significant change in disease levels over 20 years, there has been an increased reliance on fungicides, but with an accompanying resistance or reduced sensitivity to the major fungicide groups used for control.

A weather-based forecasting model for Septoria tritici blotch epidemics in winter wheat was developed further with the aim of determining when a control threshold would be reached within the period of efficacy of a systemic fungicide (Beyer et al. 2022). Some 40 plots of winter wheat which had received no fungicide treatment were monitored for necrosis caused by *Z. tritici* over the period 2017-2019. Two thresholds were defined based on two wheat growth stages at the date these thresholds were reached was termed the date of epidemic outbreak. Independent data were obtained to evaluate the predictions of the model. Within the efficacy period of a systemic fungicide the model gave correct predictions in about 85% of cases. The predicted and observed dates of epidemic outbreak were highly correlated (*r* = 0.92) with an average deviation of 3 days and maximum deviation of 19 days allowing for the fitted confidence intervals.

*Z. tritici* forms genetically diverse infections in wheat fields and may cause mixed infections in individual plants. A study was made on the effects of mixed infections on disease development, virulence, and spread/transmission in wheat plants in a glasshouse using one of four single strains or six pairwise combinations of the strains. (Barrett et al. 2021). Overall, the more virulent strains had the greater competitive ability during host colonisation, but less virulent strains had the advantage in transmission. Within-host competition had a major effect on infection dynamics and pathogen population structure and hence would be predicted to have a major effect on the dynamics of Septoria tritici blotch epidemics in wheat crops.

The prevalence of necrotrophic foliar fungal pathogens of winter wheat and triticale in field experiments at eight geographical regions of Poland was assessed from 2015-2020 (Bartosiak et al., 2021). The experiments consisted of 10 winter wheat and 10 winter triticale varieties planted in 10 m long rows. Some 350 leaf samples and infected heads were taken from each plot, giving a total of 8 x 2 x 10 x 350 leaf samples. Isolations were made from lesions on infected leaves, cultured and identified to species level by morphological methods. Over the period of the trials, the most significant pathogen on winter wheat was *Z. tritici* while on triticale *Parastagonospora nodorum* produced symptoms on the largest number of leaves. Only trace levels of *Parastagonospora avenae* f.sp triticeae was found on winter wheat and triticale.

A regional survey of 330 wheat samples was done in 2015-2017 from locations in Denmark, Norway, Germany, and the United Kingdom (50-100 samples per country over the three years) (Justesen et al. 2021. In 2015, a small number of samples was also collected from Latvia, Finland, and Sweden (eight in total). Disease severity was assessed using a rating scale and leaf segments were prepared for qPCR quantification of *Z. tritici* and *Parastagonospora nodorum* targeting the *ß-tubulin* gene and molecular screening for effectors in *Pyrenophora tritici-repentis*. Distinct regional differences were found and 65% of the samples harboured at least two of the three pathogens. The study confirmed that mixed infections of these wheat pathogens are common and carry implications for both disease management and breeding strategies.

The dynamics of *Z. tritici* in microplots of pure stands and three mixtures of two wheat cultivars was monitored in natural epidemics occurring in the cropping seasons 2017/18 and 2018/19 (Orelana-Torrejon et al., 2021). The two cultivars used were Apache with moderate susceptibility and Cellule, a cultivar whose resistance had recently broken-down. Disease severity was used as a proxy for population size and assessed twice, at early and late growth stages, as the leaf area covered by pycnidia, but scored as percentage classes. A mean disease severity index was calculated for each pure stand and the three mixture treatments. A total of 3060 strains were isolated at the two sampling times and five treatments across the two years, characterised for virulence against the major gene *Stb16qp* present in Cellule, one of the cultivars used in the study and phenotype. Disease reductions on both cultivars were observed in the mixtures relative to the pure stands but effects on the pathogen population size, size of the virulent component of the population, and the relative frequency of virulence compared with cultivar Cellule differed according to the mixture ratios used.

A large-scale genome-wide association mapping (GWAS) study was made based on 145 global strains of *Z. tritici* collected in Australia, Israel, Switzerland, and the USA, with all samples made between 1990 and 2001, under comparable field conditions (Dutta et al. 2021). Virulence and reproduction of *Z. tritici* on 12 different wheat hosts and plant responses to abiotic stressors were assessed using GWAS combined with genetic correlation analysis. Of the traits analysed most were governed by polygenic architectures and were highly heritable. There were negative correlations between host colonisation and survival in stressful environments, indicating that genetic interactions could limit host damage by the pathogen in such environments.

References

Ares, A., Pereira, J., Garcia, E., Costa, J., and Tiago, I. 2021. The leaf bacterial microbiota of female and male kiwifruit plants in distinct seasons: assessing the impact of *Pseudomonas syringae* pv. *actinidiae*. Phytobiomes Journal 5: 275-287.

Barrett, L. G., Zala, M., Mikaberidze, A., Alassimone, J., Ahmed, M., McDonald, B. A., et al. 2021. Mixed infections alter transmission potential in a fungal plant pathogen. Environmental Microbiology 23: 2315-2330.

Barro, M., Kassankogno, A. I., Wonni, I., Sérémé, D., Somda, I., Kaboré, H., et al. 2022. Spatiotemporal survey of multiple rice diseases in irrigated areas compared to rainfed lowlands in the western Burkina Faso. Plant Disease online.

Bartosiak, S. F., Arseniuk, E., Szechyńska-Hebda, M., and Bartosiak, E. 2021. Monitoring of natural occurrence and severity of leaf and glume blotch diseases of winter wheat and winter triticale incited by necrotrophic fungi *Parastagonospora* spp. and *Zymoseptoria tritici*. Agronomy 11, 967.

Beyer, M., Marozsak, B., Dam, D., Parisot, O., Pallez-Barthel, M., and Hoffmann, L. 2022. Enhancing Septoria leaf blotch forecasts in winter wheat II: model architecture and validation results. Journal of Plant Diseases and Protection 129: 45-51.

Charoenvilaisiri, S., Seepiban, C., Kumpoosiri, M., Rukpratanporn, S., Warin, N., Phuangrat, B., et al. 2021. Development of a triple antibody sandwich enzyme-linked immunosorbent assay for cassava mosaic disease detection using a monoclonal antibody to *Sri Lankan cassava mosaic virus*. Virology Journal 18: 100.

Chen, W., Zhang, Z. D., Ma, X., Zhang, G., Yao, Q., Kang Z., et al. 2021. Phenotyping and genotyping analyses reveal the spread of *Puccinia striiformis* f.sp *tritici* aeciospores from susceptible barberry to wheat in Qinghai of China. Frontiers in Plant Science 12: 764304.

Chu, X., Ma, Q., Yang, M., Li, G., Liu, J., Liang, G., et al. 2021. Diversity and distribution of xylophagous beetles from *Pinus thunbergia* Perl. and *Pinus massoniana* Lamb. infected by pine wood nematode. Forests 12: 1549.

Datta, S., Das, B., Gopalakrishnan, R., Muaka, V., Meghvansi, M. K., Vairale, M. G., et al. 2021. Detection of ‘*ancestral*’ western lineage of *Citrus tristeza virus* virulent genotype in declining *Arunachal Wakro* orange. Tropical Plant Pathology 46: 493-505.

Ding, X., Guo, Y., Ye, J., Wu, X., Lin, S., Chen, F., et al. 2021. Population differentiation and epidemic tracking of *Bursephalenchus xylophilus* in China based on chromosome-level assembly and whole-genome sequencing data. Pest Management Science: published online 17 December 2021.

Dougherty, L., Wallis, A., Cox, K., Zhong, G-Y., and Guttierez, B. 2021. Phenotypic evaluation of fire blight outbreak in the USDA *Malus* collection. Agronomy 11: 144.

Dutta, A., Hartmann, F. E., Francisco, C. S., McDonald B. A., and Croll, D. 2021. Mapping the adaptive landscape of a major agricultural pathogen reveals evolutionary constraints across heterogeneous environments. The ISME Journal 15: 1402-1419.

Eni, A. O., Efekemo, O. P., Onile-ere, O. A., and Pita, A. S. 2021. Survey data set on the epidemiological assessment of cassava mosaic disease in South West and North Central regions of Nigeria reveals predominance of a single viral infection. Data in Brief, online 13 August 2021.

Eunice, J., Miano, D., Muiru, W. M., Mutitu, E., and Macharia, I. 2021. Status of maize lethal necrosis disease in seed production systems in Kenya. Cogent Food & Agriculture 7: 1918406.

Evlice, E. 2021. Current occurrence and prevalence of root-knot nematode species *Meloidogyne* spp. Goeldi, 1892 (Tylenchida: Meloidogynidae) in ware potato fields of Turkey. Tϋrk. Entomol. Derg. 45: 217-228.

Frem, M., Fucilli, V, Nigro, F., El Moujabber, M., Abou Kubaa, R., La Notte, P., et al. 2021. The potential direct economic impact and private management costs of an invasive alien species: *Xylella fastidiosa* on Lebanese wine grapes. NeoBiota 70: 43-67.

Gangwar, O. M., Kumar, S., Bhardwaj, S. C., Prasad, P., Kashlap, P. L., Khan, H., et al. 2021. Virulence and molecular diversity among *Puccinia striiformis* f.sp. *tritici* pathotypes identified in India between 2015-2019. Crop Protection 148: 0261-2194.

Ghosh, D. K., Kokane, A. D., Kokane, S. B., Tenzin, J., Gubyard, M. G., Wangdi, P., et al. 2021. Detection and molecular characterization of ‘*Candidatus* Liberibacter asiaticus’ and citrus tristeza virus associated with citrus decline in Bhutan. Phytopathology 111: 870-881.

Godefroid, M., Morente, M., Schartel, T., Cornara, D., Purcell, A., Gallego, D., et al. 2022. Climate tolerances of *Philaenus spumarious* should be considered in risk assessments of disease outbreaks related to *Xylella fastidiosa*. Journal of Pest Science 95: 855-868.

Gschwend, F., Braun-Kiewnick, A., Widner, F., and Pelludat, C. 2021. Apple blossoms from a Swiss orchard with low-input plant protection regime reveal high abundance of potential fire blight antagonists. Phytobiomes 5: 145-155.

Hao, Z., Huang, J., Zhou, Y., Fang G. 2021. Spatiotemporal pattern of pine wilt disease in the Yangtze River basin. Forests 12: 731.

Hao, Z., Huang, J., Li, X., Sun, H., Fang, G. 2022. A multi-point aggregation trend of the outbreak of pine wilt disease in China over the past 20 years. Forest Ecology and Management 505: 119890.

He, X., Juliana, P., Kabir, M. R., Roy, K. K., Islam, R., et al. 2021. Screening and mapping for head blast resistance in a panel of CIMMYT and South Asian bread wheat germplasm. Frontiers in Genetics 12: 679162.

Iličić, R., Balaž, J., Ognjanov, V., and Popović, T. 2021. Epidemiological studies of Pseudomonas syringae pathovars associated with bacterial canker of the sweet cherry in Serbia. Plant Protection Science 57: 196-205.

Justesen, A. F., Corsi, B., Ficke, A., Hartl, L., Holdgate, S., Jørgensen, L. N., et al. 2021. Hidden in plain sight: a molecular field survey of three leaf wheat blotch fungal diseases in North-Western Europe shows co-infection is widespread. European Journal of Plant Pathology 160: 949-962.

Katono, K., Macfadyen, S., Omongo, C. A., Odong, T. L., Colvin J., Karungi, J., et al. 2021. Influence of cassava morphological traits and environmental conditions on field populations of *Bemisia tabaci*. Insects 12: 604.

Lee, Y. S., Kim, G. H., Koh, Y. J., and Jung, J. S. 2021. Identification of strA – strB genes in streptomycin-resistant *Pseudomonas syringae* pv. *actinidiae* biovar 2 strains isolated in Korea. Plant Pathology Journal 37: 489-493.

Li, M., and Nangong, Z. 2021. Precision trunk injection technology for treatment of huanglongbing (HLB)-affected citrus trees – a review. Journal of Plant Diseases and Protection 29: 15-34.

Licciardello, G., Ferraro, R., Scuderi, G., Russo, M., and Catara, A. F. 2021. A simulation of the use of high throughput sequencing as pre-screening assay to enhance the surveillance of citrus viruses and viroids in the EPPO region. Agriculture 11: 400.

Llanes-Alvarez, Y., Peña-Bárzaga, I., Batista-Le Riverend, L., Pacheco, R., Zamora-Rodríguez, V., Benítez-Galeano, M. J., et al. 2021. Prevalence of mild citrus tristeza virus isolates of the T30 genotype in Cuban commercial citrus fields after the dissemination of huanglongbing. Crop Protection 140: 105422.

Lombardo, L., Rizzo, P., Novellis, C., and Vizzarri, V. 2021. Preliminary molecular survey of the possible presence of *Xylella fastidiosa* in the upper Ionian coasts of Calabria, Italy, through the capture and analysis of its main insect vectors. Insects 12: 446.

Marquez, J., Severns, P. M., and Hajihassani, A. 2021. Influence of the environment and cropping systems on plant-parasitic nematode communities in southern Georgia. Plant Disease online 7 November 2021.

Mills, K. B., Salgada, J. D., Cruz, C. D., Valent, B., Madden, L. V., and Paul, P. A. 2021. Comparing the temporal development of wheat spike blast epidemics in a region of Bolivia where the disease is epidemic. Plant Disease 105: 96-107.

Morán, F., Barbé, S., Bastin S., Navarro, I., Bertolini, E., López, M.M., et al. 2021. The challenge of environmental samples for detection of phytopathogenic bacteria: a case study of citrus huanglongbing disease. Agronomy 11: 10.

Mugerwa, H., Colvin, J., Alicai, T., Omongo, C. A., Kabaalu, R., Visendi, P., et al. 2021. Genetic diversity of whitefly (*Bemisia tabaci* spp.) on crop and uncultivated plants in Uganda: implications for the control of this devastating pest species complex in Africa. Journal of Pest Science 94: 1307-1330.

Naz, M., Khan, S. A., Javed, N., Fatima, B. 2021. Interaction of *Meloidogyne incognita* and fungi: a potential threat to cotton crop in Punjab. Pakistan Journal of Agricultural Science 58: 1277-1290.

Nel, N., Pieterson, G., Reid, D. A., and Pieterson, G. 2021. Surveys for viruses affecting maize along the major grain transport route between Gauteng and KwaZulu-Natal in South Africa. European Journal of Plant Pathology 160: 623-635.

Oliveira, G., S. de, Fancelli, M., Brito Silva, S., X. de, Carvalho, S. R., L. de. 2021. Participatory survey of citrus in the “Recôncavo Baiano region” with emphasis on the threat of huanglongbing. Revista Brazileira Fruticultura. Online.

Om, N., Beattie, G. A. C., Donovan, N. J., Holford, P., and Agho, K. E. 2021. Incidence of psyllids and ‘*Candidatus* Liberibacter asiaticus’ in mandarin orchards at different altitudes in Tsirang, Bhutan. Tropical Plant Pathology 46: 81-97.

Orelana-Torrejon, C., Vidal, T., Boixel, A.-L., Gélisse, S., Saint-Jean, S., and Suffert, S. 2022. Annual dynamics of *Zymoseptoria tritici* in wheat cultivar mixtures: A compromise between the efficacy and durability of a recently broken-down resistance gene? Plant Pathology 71: 289-303.

Pak, D., You, M. P., Lanoiselet, V., and Barbetti, M. J. 2021. Management of rice blast (*Pyricularia oryzae*): implications of alternative hosts. European Journal of Plant Pathology 161: 343-355.

Park, J-W., da Graça, J. V., Sétamou, M., and Kunta, M. 2021. Diversity of *Citrus tristeza virus* strains in the upper gulf coast area of Texas. Plant Disease 105: 592-598.

Pordel, A., Ravel, S., Charriat, F., Gladieux, P., Cros-Arteil, S., Milazzo, J., et al. 2021. Tracing the origin and evolutionary history of *Pyricularia oryzae* infecting maize and barnyard grass. Phytopathology 111: 128-136.

Ramzan, M. Ahmed, R. Z., Khanum, T. A., Akram, S., Jabeen, S. 2021. Survey of root knot nematodes and RMi resistance to *Meloidogyne incognita* in soybean from Khyber Pakhtunkhwa, Pakistan. European Journal of Plant Pathology 160: 1-13.

Regassa, B., Abraham, A., Fininsa, C., and Wegary, D. 2021. Alternate hosts and seed transmission of maize lethal necrosis in Ethiopia. Journal of Phytopathology 169: 303-315.

Richard, K., Abdel-Rahman, E. M., Subramanian, S., Nyasani, J. O., Thiel, M., Jozani, H. J., et al. 2021. Estimating maize lethal necrosis (MLN) severity in Kenya using multispectral high-resolution data. Applied Geomatics 13: 389-400.

Rieux, A., Campos, P., Duvermy, A., Scussel, S., Martin, D., Gaudeul, M., et al. 2021. Contribution of historical herbarium small RNAs to the reconstruction of a cassava mosaic geminivirus evolutionary history. Scientific Reports 11: 21280.

Sabri, K., Mokabli, A., Mokrini, F., Khayi, S., Laasli, S-E., Smaha, D., et al. 2022. Diversity of nematophagous fungi associated with vegetable crops in Northern Algeria. Archives of Phytopathology and Plant Protection 55: 405-419. *Meloidogyne* spp.

Sánchez, C. G., Tixier, P., Fernández, A. T., Barboza, A. M. C., Sandoval Fernández, J. A., de Lapeyre de Bellaire, L. 2021. Can the banana weevil *Cosmopolites sordidus* be a vector of *Fusarium oxysporum* f.sp *cubense* race 1? Unravelling the internal and external acquisition of effective inoculum. Pest management Science 77: 3002-3012.

Shrestha, B., Martini, X., and Stelinski, L. L. 2022. Population fluctuations of *Diaphorina citri* and its natural enemies in response to various management practices in Florida. Florida Entomologist 104: 178-185.

Singh, J., Cobb-Smith, D., Higgins, E., and Khan, A. 2021. Comparative evaluation of lateral flow immunoassays, LAMP, and quantitative PCR for diagnosis of fire blight in apple orchards. Journal of Plant Pathology 103: S131-S142.

Soro, M., Tiendrébéogo, F., Pita, J. S., Traoré, E. T., Somé, K., Tibiri, E. B., et al. 2021. Epidemiological assessment of cassava mosaic disease in Burkino Faso. Plant Pathology 70: 2207-2216.

Srimali, P. U. N. E., Manamgoda, D. S., Basnayake, B. M. V. S., Thushari, A. N. W. S., and Salim, N. 2021. Molecular characterization and pathogenicity of *Fusarium* spp associated with pokkah boeng: an emerging disease of sugarcane in Sri Lanka. Sugar Tech online, 02 November 2021.

Straub, C., Colombi, E., and McCann, H. C. 2021. Population genomics of bacterial plant pathogens. Phytopathology 111: 23-31.

Szyniszewska, A. M., Chikoti, P. C., Tembo, M., Mulenga, R., Gilligan, C. A., van den Bosch, F., et al. 2021. Smallholder cassava planting material movement and grower behavior in Zambia: implications for the management of cassava virus diseases. Phytopathology 111: 1952-1962.

Teixeira, L., Heck, D., Nomura, E., Viera, H., and Dita, M. 2021. Soil attributes, plant nutrition, and Fusarium wilt of banana in São Paulo, Brazil. Tropical Plant Pathology 46: 443-454.

Thangavelu, R., Edwinraj, E., Gopi, M., Pushpakanth, P., Sharmila, K., Prabaharan, M., et al. 2022. Development of PCR-based race-specific markers for differentiation of Indian *Fusarium oxysporum* f.sp *cubense*, the causal agent of Fusarium wilt in banana. Journal of Fungi 8: 53.

Tian, D., Song, X., Li, C., Zhou, W., Qin, L., Wei, L., et al. 2021. Antifungal mechanism of *Bacillus amyloliquifaciens* strain GKT04 against *Fusarium* wilt revealed using genomic and transcriptomic analyses. MicrobiologyOpen 10: e1192.

Turner J., A., Chantry, T., Taylor, M. C., and Kennedy, M. C. 2021. Changes in agronomic practices and incidence and severity of diseases in winter wheat in England and Wales between 1999 and 2019. Plant Pathology 70: 1759-1778.

Uke, A., Tokunaga, H., Utsumi, Y., Vu, N. A., Nhan, P. T., Srean, P., et al. 2021. Cassava mosaic disease and its management in Southeast Asia. Plant Molecular Biology, online 09 July 2021.

Vincent, C., Guha, A., Killiny, L.N., and Diepenbrock, L. 2021. Understorey environment promotes photosynthetic efficiency and mitigates severity and function of an introduced, vectored pathosystem: a study of a feral citrus population in central Florida. Tree 35: 1711-1725.

Wang, C., Jiang, B., Liang, J., Li, L., Gu, Y., Li, J., et al. 2021. Population genetic structures of *Puccinia striiformis* f.sp *tritici* in the Gansu-Ningxia region and Hubei province, China. Genes 12: 1712.

**ELECTRONIC SUPPORTING INFORMATION S6. DISEASE OUTBREAKS AND EPIDEMICS OF MULTIPLE PATHOGENS**

***Objective 1. Literature review of published articles on disease outbreaks and epidemics (*multiple pathogens/cropping systems/production systems*)***

The follow sections summarise the results for categories of article from the literature review (main text Table 1, bottom section), reporting the categories in alphabetical order.

Aquaculture

Seaweed diseases in aquaculture cropping systems have been mostly ignored by plant pathologists, with most reports on pests and diseases appearing in specialist journals on phycology (from the Greek “seaweed”), often on industrial exploitation, or more general aspects of marine science.

Core article – Electronic Supporting Information, S2:

The Philippines is a major producer of farmed seaweed, the red algae *Kappaphycus alvarezii* and [*Eucheuma denticulatum*](https://en.wikipedia.org/wiki/Eucheuma_denticulatum), with many thousands of farmers involved in cultivation, used for the production of carrageenans, which are used as thickening and gelling agents in the food industry. ‘Ice-ice’ (IID) is a disease condition that arises when seaweed is placed under stress from environmental changes of salinity, temperature, and light intensity and is attacked by a range of bacterial species leading to a characteristic whitening and hardening of seaweed tissues. One of the bacteria implicated in the condition, [*Stenotrophomonas maltophilia*](https://en.wikipedia.org/wiki/Stenotrophomonas_maltophilia), is also a human pathogen. A survey (knowledge-attitudes-practices, KAP) of seaweed farmers in the Philippines on biosecurity practices for pests and diseases showed “fair” ratings for knowledge and practices and “good” for attitudes (Mateo et al., 2021). It was concluded that biosecurity measures could be improved by addressing gaps and appropriate action taken.

Supplementary articles:

An extension of the KAP approach on biosecurity was taken in Tanzania (Campbell et al. 2021) and Malaysia (Kambey et al. 2021) in comparison to the Philippines, with generally lower ratings.

Pests and diseases of seaweed were surveyed at 16 farms across major seaweed farming areas in the Philippines (Faisan et al., 2021). More than 5% of individual seaweed plants at each site were visually assessed for disease symptoms. IID was found to be present at all sites at incidences less than 25%. Overall, it was concluded that pests and diseases were major production constraints, and that better surveillance, diagnosis, and management were needed in this major aquaculture industry.

The green macroalga *Caulerpa lentillifera* is cultivated as a seafood delicacy but can be affected by bacterial diseases. The bacterial communities associated with healthy and diseased *C. lentillifera* were investigated at a company farm in Vietnam (Kopprio et al. 2021). Clear differences were found in the microbiome of healthy and diseased algae. Detrimental bacteria were found as operational taxonomic units (OUT) of the family Flavobacteriaceae, but a range of saprophytic and potentially beneficial bacteria were also found.

Crop-associated weeds

In many cases, weed species in or surrounding crops can act as reservoirs for single pathogens and/or vectors. Examples of this are given in the articles for the specific pathogens *Plenodomas lingam*, *Ca.* Phytoplasma vitis, and *Athelia rolfsii* (Electronic supporting information Table 1). In other cases, multiple pathogens are described.

Core article – Electronic Supporting Information, S2:

Korbecka-Glinka et al. (2021), Ahmed et al. (2021), Mwaipopo et al. (2021).

A survey was made of five viral pathogens of solanaceous crops, predominantly tobacco, in six provinces of Poland (Korbecka-Glinka et al. 2021). Totals of 157 samples of tobacco and 600 samples of weeds were taken for DAS-ELISA detection of tomato spotted wilt orthotospovirus (TSWV), cucumber mosaic virus, potato virus Y, tobacco mosaic virus (TMV), and tobacco ringspot virus. Some 29% of weed samples were infected with at least one of the viruses, with TSWV and TMV the most frequently detected. In most cases where tobacco was found to be infected, the same virus was found in weeds. Some weeds were found to be coinfected with all five viruses, especially species in the Asteraceae family.

In a survey of virus diversity of *Phaseolus vulgaris* in Tanzania, at least 15 different viruses from 11 different genera have been found. A further study was made to investigate the survival of *Phaseolus* viruses between seasons (Mwaipopo et al., 2021). Leaf samples were taken from 1430 wild plants within and around common bean fields across Tanzania. RT-PCR analysis of samples indicated the presence of yam bean mosaic virus and peanut mottle virus in wild leguminous plants. Mechanical transmission of cucumber mosaic virus and a novel bromovirus to common bean was demonstrated.

In most of these studies, multiple weed species have been sampled for their presence and impact on crop populations. More detailed studies have been made on individual species such as shepherd’s purse (*Capsella bursa-pastoris*), a summer or winter annual weed distributed across temperate and sub-tropical regions of the world. This weed is known to be a host for pathogens that have been reported to infect annual crops, including fungi, oomycetes, bacteria, phytoplasmas, viruses, nematodes, and parasitic plants. In Canada it has been one of the 20 most prevalent weeds since annual surveys began in 1970 (Ahmed et al. 2021).

Supplementary articles:

Malvaceous weeds in the Caribbean basin commonly show symptoms typical of viruses. Leaf samples from *Malachra* sp. and *Abutilon* sp. with golden-yellow mosaic symptoms were collected in Haiti and the Dominican Republic from 2014-2020 (Maliano et al., 2021). *Malachra* was found to be infected with the begomovirus tobacco leaf curl Cuba virus (TbLCuCV), *Abutilon* with a new begomovirus with the tentative name Abutilon golden yellow mosaic virus (AbGYMV). TbLCuCV also induced severe symptoms in *Nicotiana benthamiana* and *Phaseolus vulgaris* in host range studies, but AbGYMV seemed to be well-adapted to Abutilon and did not infect crops.

Tobacco bushy top disease affects tobacco crops in China and is caused by co-infections of several plant viruses. More than 1700 leaf samples collected from field plants, including weeds of 29 species in 13 families across China, were sampled for four viruses known to be associated with the disease (Tan et al., 2021). Some 663 samples were found to contain several co-infecting viruses, with the incidence of tobacco vein distorting virus at the highest frequency of 37.5%. Coinfections of the viruses were also found in commercial crops. Overall, the results indicate that tobacco bushy top disease has a much broader host range than previously reported and that weeds can serve as a natural reservoir of the co-infecting viruses.

Cropping system

Many of the single pathogen species listed in Electronic supporting information Table 1 on a given host crop are of course still relevant when that crop is grown in systems with mixed cropping, sequential planting within a growing season, or as part of a rotational system. However, the contention here is that the single pathogen should not be considered the nexus of a cropping system, but rather how multiple pathogens interact with multiple crops, the cropping environment, and the agronomic practices prevalent in such systems.

Core article – Electronic Supporting Information, S2:

In many crop production regions of Brazil, maize, soybean, and cotton are dominant crops with early maturing soybean grown at the onset of the rainy season followed by maize or cotton, forming a successional cropping system. In the southern Amazon region, little is known of the pests and diseases affecting these crops and a study was made to map the spatial distribution of diseases affecting soybean and maize and yield and economic losses using a smartphone application *Plantix* that provides recognition of visual disease symptoms (Hampf et al. 2021). Between 2016 and 2020, users of the application collected about 78000 georeferenced pest and disease images. Spatial distribution maps indicated the most common diseases of both crops, which when combined with expert opinion, gave estimates of crop loss of 12% for soybean and 15% for maize.

Supplementary articles:

Maize-soybean rotational systems are widespread and economically important, and by exploiting the presence of N-fixing bacteria these systems are claimed to improve plant growth and health. The interaction between biotic and abiotic factors on the rhizosphere microbiomes, which may contain both beneficial and opportunistic pathogenic species, was studied by Meier et al. (2021). The main effects were due to seasonal changes in the environment and nitrogen fertilization rather than crop rotation. However, it was suggested that the microbial community could be manipulated through plant breeding and field management to provide further beneficial effects and reduce the reliance on pesticides and industrial fertilizers.

Annual rotation of wheat and rice is a common practice in regions of China, with rice transplanted in June and harvested in November, followed by wheat sown in November and harvested in May. The continuous return of crop residues to the system may serve as an organic fertiliser but may also be a source of pathogens; aspects studied in a 2-year rotational field experiment in Zheijiang Province (Shan et al. 2021). An optimal combination of reduced nitrogen application and straw incorporation was found to significantly reduce the incidence and cluster formation of rice sheaf blight (*Rhizoctonia solani*) and false smut (*Ustilaginoidea virens*). Outbreaks of rice yellow mottle virus disease were studied in rice cropping systems from 2011-2013 in Tanzania (Sekiya et al. 2022) with different agronomic practices, including double cropping of rice and rice-maize rotation. Straw removal and crop rotation with maize were found to reduce the probability of local spread of the virus by almost 30 and 50%, respectively.

Cover crops are grown in viticulture for a range of purposes: to reduce soil erosion, improve soil structure, improve nutrient retention, and increase microbial community. A survey of grapevine cover crops, either sown or native weeds, was made across six European countries in 2019/2020 to determine the association with black-foot, a disease complex caused by *Cylindrocladium*-like asexual fungi (Léon et al., 2021). Some 685 plant species were identified and analysed, with almost 10% found to be infected with about 1% of the plated root segments yielding three fungal species. The most frequently recovered fungus, *Dactylonectria torresensis*, was associated with many cover crops in all six countries, suggesting that the cover crops may act as alternate hosts and increase inoculum levels in the soil.

Forest tree pathogens

Forest trees have very different characteristics, production systems and levels of intensive management than crops, including intensively managed fruits. Yet, despite these differences, similar processes affect pathogen population processes, adaptation and evolution in crops and forest trees, often in similar ways (Hessenauer et al. 2021). Examples of tree diseases caused by single pathogens are given in Electronic supporting information Table 1: *Bretziella fagacearum*, *Diplodia* spp., *Austropuccinia psidii*, *Cronatium ribicola*, *Diaporthe* spp., *Neonectria neomacrospora,* *Phytophthora ramorum*, *Phytophthora cinnamomi*, *Phytophthora austrocedri,* *Bursephalenchus xyophilus*, *Raffaela quercus-mongolicae*. More usual is the reporting of multiple pathogens in multiple tree hosts.

Core articles – Electronic Supporting Information, S2:

Forest tree health, globally, is affected by new and emerging pathogens and pests causing environmental and economic damage, with increasing numbers of alien invasive species being recorded in trees, plantations, and nurseries in many countries (Panzavolta et al. 2021). Forest health surveys were made annually from 2011-2020 across eight forested regions of Vietnam with observations on 16 tree species (Thu et al. 2021). Three plots (40 m x 25 m) in each region were put in place at least 20 m from any edge effects from roads, forest edges or gaps. At least 30 trees in each plot were selected randomly and assessed for disease or pest damage, with observations made in spring, summer, and autumn. The number of new and emerging pests and pathogens had increased from 2 in 2011 to 17 by 2020, with three pathogens associated with extensive damage on a range of hosts. Bark and wood samples were taken from symptomatic trees and pathogens were isolated, cultured and identified by microscopy and DNA extraction and analysis. Damage was recorded in both native and exotic species: *Ceratocystis manginecans* in acacia spp. (*Acacia*, exotic), eucalyptus spp. (*Eucalyptus*, exotic), Indian mahogany (*Chukrasia tabularis*, native), and rosewood (*Dalbergia tabulensis*, native); *Fusarium solani* in sweet bamboo (*Dendrocalamus latiflorus,* exotic); and *Phytophthora acaciivora* in acacia species and hybrids. *P. acaciivora* can cause about 20% mortality in acacia nurseries and poses a significant threat to young plantations in Vietnam. The long land and sea borders of Vietnam may have made the national biosecurity and quarantine procedures difficult to implement, and these require improvement.

The widely accepted Janzen-Connell hypothesis attributes the maintenance of tropical forest diversity to host-specialised pathogens (as well as herbivores and pests). Yet, in diverse forests, the rarity of many tree species may favour generalist pathogens with wider host ranges (Spear and Broder 2021). A series of experiments were done in which 27 potential fungal pathogens were isolated from infected tree seedlings in Panama, identified in terms of operational taxonomic units, and tested for pathogenicity on healthy seedlings of 35 tree species. Genera within the Nectriaceae, Clonastachys sp, Mycoleptodiscus spp, and Sordariomycetes sp. were found to have pathogenic associations with up to five of the tree species, leading to morbidity or mortality. Some tree species appeared to be resistant to all fungal isolates tested, whereas other species were susceptible to multiple fungal isolates. Tree species adapted to environments in which there was little disease pressure were more likely to develop the disease when challenged with fungal pathogens. Overall, it was concluded that generalist fungal pathogens can contribute to forest diversity by host-specific effects and the mortality of susceptible or disease-sensitive trees from areas where disease pressure is high.

Wild plants

There has been an increasing interest in the impacts of disease in wild plants as an indicator of environmental health and in the provision of ecosystem services (Gougherty and Davies 2021, Jeger et al. 2021). Studies on single pathogens of wild plants in natural populations are given in Electronic supporting information Tables 1-6: *Plantago*/powdery mildew, *Cakile maritima*/*Alternari brassisicola*. In other studies, multiple pathogens in wild plant communities have been studied.

Core article – Electronic Supporting Information, S2:

Foliar symptoms in wild plant communities were surveyed in 220 wild plant communities (0.5 m diameter) across a 1100 m altitudinal gradient in Switzerland in 2019. The study provided field evidence that elevation can affect host community structure and disease (Halliday et al., 2021). The main interpretation of the results was that increasing temperatures at lower elevations increased disease by providing more suitable conditions for pathogen growth and reproduction, determining which species were present at these elevations, and host life-history parameters such as growth rates, reproduction, and dispersal where fast growth rates, rapid reproduction, and high dispersal, may be correlated with a reduced defence against pathogens.

Supplementary articles:

The relationship between host plant diversity and the prevalence and diversity of viruses in populations of *Plantago lanceolata* in agricultural field edges and natural habitats was assessed (Susi and Laine, 2021). Surveys were made of 27 *P. lanceolata* populations (15 field edges, 12 natural landscapes) in the Åland Islands of Finland and five newly identified viruses of *P. lanceolata*. A high level of infection by one or more of the viruses was found in 57% of 267 plants sampled with coinfections present in 17% of plants. There was no significant difference between infection incidence in field edges and natural habitats, although virus species richness (number of virus species present in a population) was higher in the field edges.

Yearly surveys (2017-2020) were made for the occurrence of four fungal pathogens infecting wood anemone *Anemone nemorosa* in an area of about 150 m x 150 m in a nature reserve in Sweden (van Dijk et al., 2021). Initially, 139 spatially distributed patches were established, but these were significantly reduced in number, due to half the study area being clear-cut or had relocated by 2020 due to forest management operations or wild boar destroying patches. Two of the fungi, the rusts *Ochropsora ariae* and *Tranzschelia anemones*, have perennial systemic lifestyles overwintering in rhizomes, whereas a chytrid, *Synchytrium anemones*, and a smut *Urocystis anemones* have annual non-systemic lifestyles. Furthermore, it was found that the rusts usually occupied well-connected plant patches, whereas the chytrid and smut were found equally often in isolated patches and had higher patch occupancies and colonisation rates, due to spore dispersal and infection of new plants.

Wild *Citrus* spp. (China) and *Vitis* spp. (southern Europe) in areas where they are endemic can be infected by viruses and phytoplasmas respectively and are often close to cultivated grapevine and citrus, posing a potential risk to modern citrus and grapevine varieties (Liu et al. 2021, Rizzoli, 2021).

References

Campbell, I., Matteo, J., Rusekwa, S. B., Kambey, C. S. B., Hurtado, A., Msuya, F. E., et al. 2021. An international evaluation of biosecurity management capacity in the seaweed aquaculture industry. Journal of Environmental Management 304: 114112.

Faisan, J. P., Luhan, Ma. R. J., Sibonga, R. C., Mateo, J. P., Ferriols, V. M. E. N., Brakel, J., et al. 2021. Preliminary survey of pests and diseases of euchematoid seaweed farms in the Philippines. Journal of Applied Phycology 33: 2391-2405.

Hessenauer, P., Feau, N., Gill, U., Schwessinger, B., Bra, B. S., and Hamelin, R. C. 2021. Evolution and adaptation of forest and crop pathogens in the Anthropocene. Phytopathology 111: 49-67.

Kambey, C. S. B., Campbell, I., Cottier-Cook, E. J., Nor, A. R. M., Kassim, A., Sade, A., et al. 2021. Evaluating biosecurity policy implementation in the seaweed aquaculture industry of Malaysia, using the quantitative knowledge, attitudes, and practices (KAP) survey technique. Marine Policy 134: 104800.

Kopprio, G. A., Luyen, N. D., Cuong, L. H., Duc, T. M., Fricke, A., Kunnsmann, A. 2021. Insights into the bacterial community composition of farmed *Caulerpa lentillifera*: a comparison between contrasting health states. Microbiology Open 10: e1253.

León, M.; Berbegal, M.; Abad-Campos, P.; Ramón-Albalat, A.; Caffi, T.; Rossi, V., et al. 2021. Evaluation of sown cover crops and spontaneous weed flora as a potential reservoir of black-foot pathogens in organic Viticulture. *Biology* *10*: 498.

Liu, Q., Zhang, S., Mei, S., Zhou, Y., Wang, J., Han, G.-Z., et al. 2021. Viromics reveals extraordinary genetic diversity of the family Closteroviridae in wild citrus. PLoS Pathogens 17: e1009751.

Maliano, M. R., Macedo, M. A., Rojas, M. R., and Gilbertson, R. L. 2021. Weed-infecting viruses in a tropical agroecosystem presents different threats to crops and evolutionary histories. PLoS ONE 16: e0250066.

Meier, M. A., Lopez-Guerrero, M. G., Guo, M., Schmer, M. R., Herr, J. R., Schnable, J. C. 2022. Rhizosphere microbiomes in a historical maize-soybean rotation system respond to host species and nitrogen fertilization at the genus and subgenus levels. Applied and Environmental Microbiology 87: e03132-20.

Rizzoli, A., Belgeri, E., Jermini, M., Conedera, M., Filippin, L., and Angelini, E. 2021. *Alnus glutinosa* and *Orientus ishidae* (Matsumura, 1902) share phytoplasma genotypes linked to the ‘Flavescence dorée’ epidemics. Journal of Applied Entomology 145: 1015-1028.

Sekiya, N., Nakajima, T., Oizumi, N., Kurosawa, C., Tibanyendela, N., Peter, M. A. 2022. Agronomic practices prevented local outbreaks of rice yellow mottle virus disease revealed by spatial autoregressive analysis. Agronomy for Sustainable Development 42: 15.

[Shan,](https://www.sciencedirect.com/science/article/abs/pii/S0269749121013233" \l "!) A., [Pan, A.,](https://www.sciencedirect.com/science/article/abs/pii/S0269749121013233#!) [Kang, K. J.,](https://www.sciencedirect.com/science/article/abs/pii/S0269749121013233#!) [Pan,](https://www.sciencedirect.com/science/article/abs/pii/S0269749121013233" \l "!) M., [Wang,](https://www.sciencedirect.com/science/article/abs/pii/S0269749121013233#!) G., [Wang,](https://www.sciencedirect.com/science/article/abs/pii/S0269749121013233#!) M., et al. 2021. Effects of straw return with N fertilizer reduction on crop yield, plant diseases and pests and potential heavy metal risk in a Chinese rice paddy: A field study of 2 consecutive wheat-rice cycles. [Environmental Pollution](https://www.sciencedirect.com/journal/environmental-pollution) 288: 117741.

Susi, H. and Laine, A.-L. 2021. Agricultural land use disrupts biodiversity mediation of virus infections in wild plant populations. New Phytologist 230: 2447-2458.

Tan, S-T., Liu, F., Lv, J., Liu, Q-L., Luo, H-M., Yu, Y., et al. 2021. Identification of two novel poleroviruses and the occurrence of Tobacco bushy top disease causal agents in natural plants. Scientific Reports 11: 21045.

Van Dijk, L. J. A., Erhlén, J., and Tack, A. J. M. 2022. The relationship between pathogen life-history traits and metapopulation dynamics. New Phytologist 233: 2585-2598.

**ELECTRONIC SUPPORTING INFORMATION S7. NEW RECORDS**

***Objective 2. Records in the CABI Distribution Database (single pathogens, following manual review)***

The follow sections summarise the results for named pathogens identified via the DDB (see Main text Table 2), reporting the pathogens in alphabetical order.

*Aphelenchoides besseyi*

*Aphelenchoides besseyi* (rice leaf nematode) has a wide global distribution (CABI, 2022a). Manual review of records added to the DDB in 2021 shows that four records constitute new reports, although together they refer to just two geographic locations. *A. besseyi* has been found on yam (*Dioscorea cayenensis*) for the first time in two states in Brazil (Noronha et al., 2020; EPPO, 2021). Symptoms, including brown lesions on leaves leading to defoliation, were observed on plants between 2017 and 2019 in the states of Alagoas and Sergipe in eastern Brazil (Noronha et al., 2020). These records are not the first report of *A. besseyi* in Brazil where it has been present for decades (CABI, 2022a).

Apple hammerhead viroid

First identified in China and subsequently reported in other countries including Italy, Spain, USA, Japan, and New Zealand (Zhang et al., 2014; Szostek et al., 2018), *Apple hammerhead viroid* (AHVd) is now found on most continents. Manual review of results from the DDB indicated four confirmed first reports were added in 2021 for this pathogen; Tunisia, India, Jammu and Kashmir (India) and Rio Grande do Sul (Brazil).

Sequences of AHVd isolates collected from Tunisia in 2019 were deposited with NCBI GenBank in 2020 (GenBank, 2021). These isolates confirmed the first report of AHVd on apple in Tunisia. Hamdi et al. (2022) subsequently published the findings related to these GenBank accessions.

Leaf samples collected from apple trees in 2019 from the Jammu and Kashmir Union territory were analysed and the first report of AHVd in the territory, but also in India as a whole, was confirmed (Nabi and Baranwal, 2020). This report indicates the spread of the viroid to a new region of Asia.

Nickel et al. (2021) published a summary at the 32nd Brazilian congress on Virology confirming the first report of AHVd in Brazil. Samples from apple orchards in Rio Grande do Sul were sequenced, and presence of the viroid confirmed, however the year in which the samples were collected is not clear. The authors highlight that more information on the extent and potential impacts of AHVd is needed.

Apple rubbery wood viruses

Recorded in parts of Europe, North America, Asia and Oceania, Apple rubbery wood disease infects species of apple, pear, and quince (CABIa, 2022). The causal agent for this disease has been the subject of much debate. Recently, Rott et al. (2018) detected two viruses, Apple rubbery wood virus (ARWV) 1 and 2 using next-generation sequencing, which they tentatively suggest may be the causal agent. Manual review of DDB records revealed eight records that were considered new reports for these viruses, all of which related to China and provinces in the east of China, including Fujian, Jiangxi, Hubei, and Shandong.

Hu et al. (2021a) report the first confirmed occurrence of ARWV-2 in domestic apples in China after samples from a range of cultivars in Liaoning province were analysed. Hu et al. (2021b) collected 200 samples from leaf and shoots of apple trees in China to test for the prevalence of associated viruses. ARWV-1 was identified for the first time in China in 21 samples from the provinces of Hebei, Liaoning, and Shandong. Coinfection with ARWV-2 was common among these samples.

Records added to the DDB from EPPO Global Database in 2021 also indicate the first report of ARWV-2 infecting pear trees. Wang et al. (2019) identified the virus in leaf samples from *Pyrus pyrifolia* and *P. bretschneideri* in commercial orchards across Fujian, Jiangxi, Hubei, and Shandong provinces.

*Biscogniauxia mediterranea*

*Biscogniauxia mediterranea* occurs across North and South America, much of Europe and parts of Africa and Asia (CABI, 2022b). One record added to the DDB in 2021 indicates an expansion in the host range of the pathogen in the USA.

Wright et al. (2022) published the first report of *B. mediterranea* on the host plant *Quercus emoryi* (emory oak) in Arizona, USA after tissue samples taken from hosts in 2019 were analysed. Southwestern states of the USA are becoming increasingly hot and dry due to climate change. With *B. mediterranea* commonly associated with water-stressed trees, increasing incidence of this pathogen is likely and threatens important woodland habitats in the region (Wright et al., 2022).

*Candidatus* Liberibacter asiaticus (*: see also results of Objective 1)

The Asian form of *Ca*. Liberibacteris the most widespread of the *Ca*. Liberibacter species, which cause citrus greening disease or ‘huanglongbing’ (CABI, 2022a). The pathogen is not reported to be present in Europe or the Mediterranean but does affect major citrus producers such as Brazil, China, and the USA (CABI, 2022a). One new report was identified by the manual review of DDB records in Bahia, Brazil.

A record added to the DDB from the EPPO Global Database in 2021 shows *Ca.* L. asiaticus was recorded for the first time in the state of Bahia in the east of Brazil (EPPO, 2021). This was based on samples taken from the vector *Diaphorina citri* between 2011 and 2014. Though by no means the first record in Brazil (it was first reported in the country in 2004), EPPO cite a paper by Abreu et al. (2020) which states that citrus greening disease caused by *Ca*. L. asiaticusis a major threat to the citrus industry in the state of Bahia.

Citrus tristeza virus (*: see also results of Objective 1)

Globally widespread, *Citrus tristeza virus* (CTV) has been introduced to nearly all citrus-growing regions of the world (CABI, 2022a). Manual review of records added to the DDB in 2021 shows one first report in Tunisia.

The first report of CTV in Tunisia was confirmed after samples taken in 2018 were analysed (IPPC, 2021). Samples had been collected from the northeast of the country and it is now under official control.

*Colletotrichum siamense*

*Colletotrichum siamense* occurs across much of Asia as well as the Americas and Australia (CABI, 2022a). Manual review of distribution records added to the DDB in 2021 show four new reports, one indicating the first report of the pathogen in New Zealand and the remaining three indicating first reports on new host plants.

Hofer et al. (2021) report the first confirmed occurrence of *C. siamense* in New Zealand. It was found on *Persea americana* (avocado) after samples were collected from commercial orchards in 2019. The authors highlight that it is difficult to tell different *Colletotrichum* species apart based only on morphological characters, so sequencing is important and allows more informed decision making in terms of prevention and control (Hofer et al., 2021).

Yang et al. (2021) isolated *C. siamense* in 2019 from leaf samples of *Vernicia montana* (Chinese wood oil tree) in Jiangxi, China. This is the first time it has been identified on this host, but it is already known to cause damage on other important host plants.

The first report of *C. siamense* on *Ocimum basilicum* (Thai basil) in Malaysia was reported by Ismail et al. (2021). Symptoms were observed on inflorescences of basil plants in 2019 and tissue samples analysed. Control measures available for this disease are lacking and it is therefore a high risk to Thai basil cultivation in Malaysia (Ismail et al., 2021).

*C. siamense* has previously been identified on *Allium cepa* (onion) in India however, Herath et al. (2021) reported the first occurrence of this pathogen on onion in Sri Lanka based on analysis of samples collected from onion plants in mid-2020. The authors highlight that this range expansion poses a threat to onion crops in Sri Lanka and has already led to severe crop losses in onion-producing regions of the country.

Cucurbit chlorotic yellows virus

The distribution of *Curcurbit chlorotic yellows virus* (CCYV) includes Africa (Algeria, Egypt, Sudan), parts of Asia, a handful of countries in Europe (Cyprus, Greece, Spain) and the USA, where it has a localized distribution (CABI, 2022a). Distribution records added to the DDB in 2021 indicate first reports of CCYV in 11 geographic locations. These include four countries: India (Kumar et al., 2022), Philippines (Chang et al., 2021), South Korea (Cho et al., 2021) and Spain (Chynoweth et al., 2021). The remaining records are for subnational locations. First reports are all based on observations or samples taken between 2018 and 2020.

The first report of CCYV in India occurred on pumpkin plants in New Delhi (Kumar et al., 2022). Symptoms were observed from August 2020 and the authors highlight a need to complete surveys to understand the extent and impact of infections with CCYV.

The report from Spain suggests CCYV may have spread undetected in the Mediterranean Basin as the symptoms of the disease resemble those of other cucurbit infecting viruses (Chynoweth et al., 2021). Subsequently, Alfaro-Fernandez et al. (2022) reported the first occurrence of CCYV in Tenerife, Canary Islands. The paper states the need for control measures to limit the spread of CCYV within Tenerife and beyond to other nearby islands.

The DDB also contains a record of the first natural infection of pumpkins in mainland China (Hunan Province) in 2020 (Liu et al., 2021). Authors highlight that the rapid evolution and spread of the virus suggest there is potential for it to cause high levels of crop loss in future. They also emphasise the importance of early detection and prevention of CCYV. However, this is not the first record of the virus in China as a whole. It is found in other provinces in the country and was first reported in 2007 (EPPO, 2021).

CCYV had previously been recorded in the USA in California on melon in 2018 (Wintermantel et al., 2019). Analysis of records added to the DDB in 2021 indicate CCYV has since spread. Reports confirmed the presence of CCYV in four more US states: Alabama, Florida, Georgia and Texas (Mondal et al., 2022, Jailani et al., 2022, Kavalappara et al., 2021, Hernandez et al., 2021 respectively). All of these reports are based on samples collected in 2020.

*Erysiphe corylacearum*

*Erysiphe corylacearum* has been identified in parts of Asia and Europe causing disease with powdery mildew symptoms on hazelnut trees (*Corylus* spp.) (CABI, 2022a). A manual review of DDB records for this pathogen showed three records that all relate to first reported occurrences of *E. corylacearum* in Romania.

Chinan and Mânzu (2021), published their report in March of 2021, followed by a report by Rosati et al. (2021) in September 2021. The former publication confirms the presence of the pathogen in the Romanian Carpathians and the latter in commercial orchards in Dudeștii Vechi in the far west of the country. Identification by Rosati et al. (2021) was based on samples taken in October 2020 and it is suggested the pathogen may have spread east to west through the Caucasus into Europe due to its presence in Turkey, Azerbaijan, Georgia, and Iran. EPPO (2021) also updated the pathogen status in Romania in 2021 because of these publications.

*Erwinia rhapontici*

*Erwinia rhapontici*, commonly known as rhubarb crown rot, is present across Asia, Europe, North America and in New Zealand. In some locations, it has been reported as widespread (Poland, United Kingdom, Israel) (CABI, 2022a). Manual review of records added to the DDB in 2021 highlights one first report on a new host plant.

Wang et al. (2022) reported the first instance of *E. rhapontici* causing stalk rot of celery in China. According to the authors, this is the first time *E. rhapontici* has been reported on this host plant. Soft rot symptoms were observed on celery in May 2021 in Hebei Province. Wang et al. (2022) emphasise the threat this poses to local celery production and the need for prevention and control measures to manage it.

This is not the first occurrence of *E. rhapontici* in China overall. It has also been recorded previously in Sichuan Province causing disease in kiwifruit (Wang et al., 2017) and in Hubei province in 2010 associated with roots of the orchid, *Cymbidium faberi* (Chu et al., 2010).

*Fusarium oxysporum* f.sp. *cubense* Tropical race 4 (*: see also results of Objective 1)

Known commonly as Fusarium wilt or Panana disease, *Fusarium oxysporum* f.sp. *cubense* Tropical race 4 (TR4) is a soilborne fungus and a major threat to banana production globally (CABI, 2022a). First reported in Southeast Asia it has since been recorded in Australia, the Middle East and Africa (CABI, 2022a). Manual review of records from DDB shows a new report of this pathogen in Peru.

In 2021 a press release was published by SENASA (National Agricultural Health Service of Peru) confirming the first report of TR4 in a 0.5-hectare plot of land in the department of Piura in northwestern Peru. Phytosanitary measures were immediately put in place to limit the spread and impact of the outbreak. This included limiting access to the site, destruction of the plants from the plot, training for farmers and increased surveillance in other banana producing locations (SENASA, 2021).

*Globodera rostochiensis*

*Globodera rostochiensis*, commonly known as the yellow potato cyst nematode, is widely distributed throughout potato growing regions of the world (CABI, 2022a). Manual review of DDB records showed one new report of this pathogen occurring in Sulawesi, Indonesia.

First recorded in Indonesia itself in 2003, *G. rostochiensis* was shown to be present in Sulawesi for the first time in 2020 (EPPO, 2021). This EPPO record is based on a publication by Handayani et al. (2020), who identified the pathogen in soil samples collected from a potato field in north Sulawesi. The study also found the nematode in fields in Sumatra and Java.

*Nothophoma quercina*

Following a manual review of DDB records for this pathogen, a first report was found for *N. quercina* on the ornamental plant *Photinia* x *fraseri* in China (Zou et al., 2021). It was identified when bud blight disease was observed on *P.* *fraseri* in 2017 and 2018, when leaf samples were collected and analysed. Zou et al. (2021) state that this is the first report of the pathogen on this host plant and the first report in China.

Potato spindle tuber viroid

*Potato spindle tuber viroid* (PSTVd) occurs in Egypt, Ghana, and Nigeria in Africa and in various parts of Asia (CABI, 2022a). Its distribution is patchy, with erratic outbreaks in various countries where it then comes under eradication. Successful eradication was reported for Canada and the USA in the mid-2000s (CABI, 2022a). Records added to the DDB in 2021 highlight three new reports of PSTVd. Two in Africa (Uganda and Kenya) and a first report of the viroid on tomato in India.

First reports of PSTVd in Uganda and Kenya were confirmed in seeds of *Solanum* wild relative species (EPPO, 2021). The records from the EPPO Global Database reference Skelton et al. (2019), who report that the seed was tested for PTSVd to confirm it was suitable to be distributed to a centre for pre-breeding research. At the pre-breeding centre, it would have been used to assess genetic diversity of samples to help develop improved crop varieties. The authors state that this demonstrates the potential of pospiviroids to be distributed through non-commercial seed.

Records also indicate the first report of natural infection by PSTVd on tomato in India; this is not the first report of this viroid in India overall but is the first on this host plant in the country. PSTVd is under stringent phytosanitary regulations because it already infects potatoes in India (Natarajamurthy, et al. 2021).

*Tomato brown rugose fruit virus*

First identified in Jordan in 2016, *Tomato brown rugose fruit virus* (ToBRFV) has since been identified almost exclusively on tomato plants in Asia, Europe and some regions of North America (CABI, 2022a). Manual review of distribution records in the DDB identified through the automated process show 15 confirmed first reports in new geographic locations. Ten of these are for countries where the virus was observed and sampled in 2021 across Europe (Austria, Estonia, Hungary, Malta, Norway, Portugal, Slovenia and Switzerland) and Asia (Iran, Saudi Arabia). For example, Ghorbani et al. (2021) first observed symptoms consistent with the presence of ToBRFV in greenhouses in Iran in August 2021. Infection with ToBRFV was subsequently confirmed and plants destroyed. Sabra et al. (2022) suggest infection of tomato plants in Saudi Arabia may have been caused by imported seed from a country with the virus. Many of these new occurrences have been reported by National Plant Protection Organisations (EPPO, 2021). The virus is currently under eradication in the majority of the countries listed above and has already been reported as eradicated in Estonia (EPPO, 2022).

The remaining five records confirmed first reports highlight recent outbreaks that were based on surveys carried out pre-2021, although the reports themselves were published in 2021 or first available online in 2021. In 2017, ToBRFV was confirmed on tomatoes grown in greenhouses in Syria (Hasan et al., 2022). It was confirmed as present in the United States of America in California in 2018 (EPPO, 2021). Although it has since been eradicated from California, records in the DDB show that EPPO now record it as present in the country due to a new record from Florida from 2019 (Dey et al., 2021). In 2020, outbreaks were reported on tomato in Belgium and Uzbekistan and on pepper (*Capsicum annuum*) and tomato plants in Czechia (EPPO, 2021).

References

Abreu, E. F. M., Lopes A. C., Fernandes A. M., Silva, S. W. B., Barbosa, C. J., Nascimento, A. S., et al. 2020. First report of HLB causal agent in psyllid in State of Bahia, Brazil. Neotropical Entomology 49:780-782.

Alfaro-Fernandez, A., Espino, A., Botella-Guillen, M., Font, M. I., Sanahuja, E., Galipienso, L., et al. 2022. First report of cucurbit chlorotic yellows virus infecting watermelon and zucchini in the Canary Islands, Spain. Plant Disease (in press). Doi: 10.1094/PDIS-10-21-2296-PDN.

CABI, 2022a. Crop Protection Compendium. Wallingford, UK: CABI. <https://www.cabi.org/cpc>

CABI, 2022b. Forestry Compendium. Wallingford, UK: CABI. <https://www.cabi.org/fc>

Chang, H., Chen, L.-C., Lin, C., Tsai, W.-S. 2021. First report of cucurbit chlorotic yellows virus infecting melon, watermelon and wild melon in the Philippines. Journal of Plant Pathology. 103:681-682.EPPO, 2021. EPPO Global database. Paris, France: EPPO. <https://gd.eppo.int/>

Chinan, V.-C., Mânzu, C. C. 2021 Occurrence of Erysiphe corylacearum causing powdery mildew of Corylus avellana in Romania. Forest Pathology. 51:e12681.

Cho, I. S., Kim, T.-B., Yoon, J.-Y., Chung, B. N., Hammond, J., Lim, H.-S. 2021. First report of Cucurbit chlorotic yellows virus infecting Cucumis melo (muskmelon and oriental melon) in Korea. Plant Disease. 105:2740.

Chu, X., Yang, B., Gao, L., Li, H., Hu, L., Yang, N. 2010 Species diversity of cultivable bacteria isolated from the roots of *Cymbidium faberi* Rolfe. Journal of Wuhan Botanical Research 28:199-205.

Chynoweth, R., Jimenez, D., Liberti, D., Bellon-Dona, D., Carralero-González, A., Crespo-Sempere, A., et al. 2021. First report of cucurbit chlorotic yellows virus infecting cucumber plants in Spain. Plant Disease. 105:2258.

Dey, K., Vilez-Climent, M., Soria, P., Batuman, O., Mavrodieva, V., Wei, G., et al. 2021. First report of Tomato brown rugose fruit virus (ToBRFV) infecting tomato in Florida, USA. New Disease Reports. 44: e12028.

EPPO, 2022. Eradication on tomato brown rugose fruit virus in Estonia. EPPO Reporting Service no 04 – 2022. Num. articles: 2022/086. <https://gd.eppo.int/reporting/article-7317>

Genbank, 2021. First report of apple hammerhead viroid infecting apple cultivars in Tunisia [Hamdi I, Najar A, unpublished]., <https://www.ncbi.nlm.nih.gov/>

Ghorbani, A., Rostami, M., Seifi, S., Izadpanah, K., 2021. First Report of Tomato brown rugose fruit virus in greenhouse tomato in Iran. New Disease Reports. 44: e12040.

Hamdi, I., Soltani, R., Baraket, G., Varsani, A., Najar, A. 2022. First report of apple hammerhead viroid infecting ‘Richared Delicious’ apple (Malus domestica) in Tunisia. Journal of Plant Pathology. 103:811-812.

Handayani, N. D., Esquibet, M., Montarry, J., Lestari, P., Couvreur, M., Dikin, A., et al. 2020. Distribution, DNA barcoding and genetic diversity of potato cyst nematodes in Indonesia. European Journal of Plant Pathology. 158:363–380.

Hasan, Z. M., Salem, N. M., Ismail, I. D., Akel, I., Ahmad, A.Y. 2022. First Report of Tomato Brown Rugose Fruit Virus on Tomato in Syria. Plant Disease. 106:772.

Herath, I. S., Udayanga, D., Miriyagalla, S., Castlebury, L. A., Manamgoda, D. S. 2021. *Colletotrichum siamense* causing anthracnose-twister disease of onion (*Allium cepa*) in Sri Lanka. Australasian Plant Disease Notes. 16: 30.

Hernandez, R. N., Isakeit, T., Al Rwahnih, M., Hernandez, R., Alabi, O. J. 2021 First report of *Cucurbit chlorotic yellows virus* infecting cantaloupe (*Cucumis melo* L.) in Texas. Plant Disease. 105:3313.

Hofer, K. M., Braithwaite, M., Braithwaite, L. J., Sorensen, S., Siebert, B., Pather, V. et al. 2021. First report of *Colletotrichum fructicola*, *C. perseae*, and *C. siamense* causing anthracnose disease of avocado (*Persea americana*) in New Zealand. Plant Disease. 105:1564-1564.

Hu, G., Dong, Y., Zhang, Z., Fan, X., Ren, F., Lu, X. 2021a. First report of apple rubbery wood virus 2 in apple in China. Plant disease 105:519.

Hu, G., Dong, Y., Zhang, Z., Fan, X., Ren, F., Lu, X. 2021b. First report of apple rubbery wood virus 1 in apples in China. Plant Disease 105:3770.

IPPC 2021. (Premier signalement du virus de la tristeza ou Citrus tristeza virus (CTV) en Tunisie). In: IPPC Official Pest Report, TUN-02/4, Rome, Italy: FAO. <https://www.ippc.int/>

Ismail, S. I., Rahim, N. A., Zulperi, D. 2021. First report of *Colletotrichum siamense* causing blossom blight on Thai basil (*Ocimum basilicum*) in Malaysia. Plant Disease. 105:1209.

Jailani, A. A., Iriarte, F., Hochmuth, B., Willis, S. M., Warren, M., Dey, K., et al. 2022. First report of cucurbit chlorotic yellows virus affecting watermelon in the United States. Plant Disease. 106:774.

Kavalappara, S. R., Milner, H., Sparks, A. N., McGregor, C., Wintermantel, W. M., Bag, S. 2021 First report of cucurbit chlorotic yellows virus in association with other whitefly-transmitted viruses in squash (*Cucurbita pepo*) in Georgia. Plant Disease. 105:1862.

Kumar, A., Rout, B. M., Choudhary, S., Sureja, A. K., Baranwal, V. K., Pant, R. P., et al. 2022. First report of cucurbit chlorotic yellows virus (CCYV) infecting pumpkin in India. Plant Disease. 106:1767.

Liu, F., Liu,Y., Zhang, D., Liu, J., Li, X., Liang-ying, D., et al. 2021. Molecular and evolutionary analysis of cucurbit chlorotic yellows virus naturally infecting pumpkin. Acta Phytopathologica Sinica. 51: 1-10.

Mondal, S., Jenkins Hladky, L. L., Melanson, R. A., Singh, R., Sikora, E., Wintermantel, W. M. 2022. First report of cucurbit yellow stunting disorder virus and cucurbit chlorotic yellows virus in cucurbit crops in Alabama. Plant Disease. 106:776.

Nabi, S. U., Baranwal, V. K. 2020. First report of apple hammerhead viroid infecting apple cultivars in India. Plant Disease. 104:3086-3087.

Natarajamurthy, S., Bhat, S. K. S., Ramanayaka. J. G. 2021. Occurrence of natural infection of tomato by Potato spindle tuber viroid (PSTVD) in India. Australasian Plant Disease Notes. 16: 20..

Nickel, O., Fajardo, T. V. M., Candresse, T. 2021. First report on occurrence of apple hammerhead viroid in apples in Brazil. [Anais do XXXII Congresso Brasileiro de Virologia: Virologia em Casa], url: <https://ainfo.cnptia.embrapa.br/digital/bitstream/item/227442/1/Fajardo-2021-XXXCBV.pdf>

Noronha, M. A., Assunção, M. C., Costa, M. G. S., Muniz, M. F. S., Favoreto, L., Sercero, B. C., et al. 2021. First report of *Aphelenchoides besseyi* causing leaf spot on yam (*Dioscorea cayenensis*) in Brazil. Plant Disease. 104:3083-3084.

Rosati, M., Bogoescu, M., Spadaro, D. 2021 First report of *Erysiphe corylacearum*, agent of powdery mildew, on hazelnut (*Corylus avellana*) in Romania. Plant Disease 105:2728-2729.

Rott, M. E., Kesanakurti, P., Berwarth, C., Rast, H., Boyes, I., Phelan, J., et al. 2018. Discovery of Negative-Sense RNA Viruses in Trees Infected with Apple Rubbery Wood Disease by Next-Generation Sequencing. Plant Disease. 1021:254-1263.

Sabra, A., Al-Saleh, M. A., Al-Shahwan, I. M., Amer, M. A. 2022. First report of Tomato brown rugose fruit virus infecting tomato crop in Saudi Arabia. Plant Disease. 106:1310.

SENASA, 2021. (SENASA confirma brote de Fusarium Raza 4 Tropical en Piura)., Peru: Servicio Nacional de Sanidad Agraria del Perú (SENASA). url: <https://www.gob.pe/institucion/senasa/noticias/429832-senasa-confirma-brote-de-fusarium-raza-4-tropical-en-piura>

Skelton, A., Buxton-Kirk, A., Fowkes, A., Harju, V., Forde, S., Ward, R., et al. 2019. *Potato spindle tuber viroid* detected in seed of uncultivated *Solanum anguivi*, *S. coagulans* and *S. dasyphyllum* collected from Ghana, Kenya and Uganda. New Disease Reports 39:23.

Szostek, S. A., Wright, A. A., Harper, S.J. 2018. First report of apple hammerhead viroid in the United States, Japan, Italy, Spain, and New Zealand. Plant Disease. 102:2670.

Wang, D., Yang, X., Chen, H., Kan, Y. Y., Yao, J. X., Li, Q. et al. 2017. First report of *Erwinia rhapontici* causing bacterial leaf spot on kiwifruit in China. Plant Disease. 101:1315.

Wang, Y., Wang, G. P., Hong, N., Wang, Y. X., Yang, Z. K., Guo, J. S., et al. 2019. First report of Apple Rubbery Wood Virus 2 infecting pear (*Pyrus* spp.) in China. Plant Disease 103:3293.

Wang, J. H., Han, W. X., Pan, Y., Guo, A., Zhang, D., Zhao, D. M., *et al.* 2022. First Report of Stalk Rot of Celery Caused by *Erwinia rhapontici* in China. Plant Disease. 106:1513.

Wintermantel, W. M., Jenkins Hladky, L. L., Fashing, P., Ando, K., McCreight, J. D. 2019 First report of Cucurbit chlorotic yellows virus infecting melon in the New World. Plant Disease. 103:778.

Wright, S. A., Lalande, B., Wilhelmi, N., Stewart, J. E. 2022. First Report of *Biscogniauxia mediterranea* on *Quercus emoryi* in southern Arizona. Plant Disease. 106:1305.

Yang, D., Zhang, Y., Zhang, Y. T., Wang, Q. H., Qi, Y. K., Zhu, W. C., et al. 2021. First report of leaf spot disease caused by *Colletotrichum siamense* on Vernicia Montana in China. Plant Disease. 105:1566.

Zhang, Z., Qi, S., Tang, N., Zhang, X., Chen, S., Zhu, P., et al. 2014. Discovery of Replicating Circular RNAs by RNA-Seq and Computational Algorithms. PLOS Pathogens. 10: e1004553.

Zou, J., Dong, Y., Wang, H., Liang, W., Li, D. 2021. Identification and characterization of *Nothophoma quercina* causing bud blight on *Photinia* × *fraseri* in China. Plant Disease. 105:1356-1364.
